# Supplementary material for: Cyanido-bridged diplatinum( ii ) complexes: ligand and solvent effect on aggregation and luminescence
Source: Royal Society of Chemistry journal article supplement (doi:10.1039/d3sc06941a), 2024-01-01
Supplement: d3sc06941a1.pdf [file d3sc06941a1.pdf]

## Electronic Supporting Information (ESI)

# Cyano-bridged diplatinum(II) complexes: ligand and solvent effect on aggregation and luminescence

Viktoria V. Khistiaeva,<sup>a</sup> Stefan Buss,<sup>b</sup> Toni Eskelinen,<sup>a</sup> Pipsa Hirva,<sup>a</sup> Niko Kinnunen,<sup>a</sup> Joshua Friedel,<sup>c</sup> Lukas Kletsch,<sup>d</sup> Axel Klein,<sup>\*c</sup> Cristian A. Strassert,<sup>\*b</sup> Igor O. Koshevoy<sup>\*a</sup>

<sup>a</sup> Department of Chemistry, University of Eastern Finland, P.O. Box 111, FI-80100 Joensuu, Finland.

<sup>b</sup> Institut für Anorganische und Analytische Chemie, Universität Münster, CiMIC, CeNTech, Heisenbergstraße 11, 48149 Münster, Germany

<sup>c</sup> University of Cologne, Faculty of Mathematics and Natural Sciences, Department of Chemistry, Institute for Inorganic Chemistry, Greinstrasse 6, D-50939 Cologne, Germany.

E-mail: [axel.klein@uni-koeln.de](mailto:axel.klein@uni-koeln.de), [cstra\\_01@uni-muenster.de](mailto:cstra_01@uni-muenster.de), [igor.koshevoy@uef.fi](mailto:igor.koshevoy@uef.fi)

### Contents

|                                                                                                                                             |     |
|---------------------------------------------------------------------------------------------------------------------------------------------|-----|
| <b>Experimental Section</b>                                                                                                                 | S3  |
| <b>Supporting Tables and Figures</b>                                                                                                        | S7  |
| <b>Table S1.</b> Crystal data and structure refinement for <b>1</b> , <b>2</b> , <b>3</b> ·CH <sub>2</sub> Cl <sub>2</sub> and <b>4</b> .   | S8  |
| <b>Table S2.</b> Selected bond lengths (Å) and angles (°) for complexes <b>1</b> , <b>3</b> ·CH <sub>2</sub> Cl <sub>2</sub> and <b>4</b> . | S10 |
| <b>Fig. S1.</b> Molecular view and fragment of crystal packing of complex <b>2</b> .                                                        | S11 |
| <b>Fig. S2.</b> Fragments of crystal packing for complexes <b>1</b> , <b>3</b> ·CH <sub>2</sub> Cl <sub>2</sub> , and <b>4</b> .            | S12 |
| <b>Fig. S3.</b> Powder XRD patterns for <b>1</b> to <b>4</b> .                                                                              | S13 |
| <b>Fig. S4.</b> Photoluminescence spectra of compounds <b>1</b> to <b>4</b> in the solid state at 77 K.                                     | S14 |
| <b>Fig. S5.</b> Photoluminescence spectra of complex <b>3</b> in the solid state at 298 K.                                                  | S14 |
| <b>Fig. S6.</b> ESI-MS of compounds <b>1</b> to <b>4</b> .                                                                                  | S15 |
| <b>Fig. S7.</b> <sup>1</sup> H NMR spectra of compounds <b>1</b> and <b>2</b> at 293 K.                                                     | S16 |
| <b>Fig. S8.</b> <sup>1</sup> H NMR spectra of compounds <b>3</b> and <b>4</b> at 293 K.                                                     | S17 |
| <b>Fig. S9.</b> UV-vis absorption spectra of compounds <b>1</b> to <b>4</b> .                                                               | S18 |
| <b>Table S3.</b> UV-vis absorption maxima of compounds <b>1</b> to <b>4</b> .                                                               | S18 |
| <b>Table S4.</b> TD-DFT-calculated lowest-lying singlet-singlet vertical excitations and lowest singlet-                                    | S19 |

triplet vertical excitations for diplatinum cations of **1** to **4** in CH<sub>2</sub>Cl<sub>2</sub>.

**Fig. S10.** Natural transition orbital hole-particle pair for the vertical S<sub>0</sub>→S<sub>1</sub> transitions for the diplatinum cations of **2** to **4** in CH<sub>2</sub>Cl<sub>2</sub>. S20

**Table S5.** Photophysical data of mononuclear congeners [Pt(C<sup>^N</sup><sup>^\*</sup>N)(CN)] (**1\_mono** to **4\_mono**) in CH<sub>2</sub>Cl<sub>2</sub> solution. S20

**Fig. S11.** Excitation and emission spectra of complexes [Pt(C<sup>^N</sup><sup>^\*</sup>N)(CN)] (**1\_mono** to **4\_mono**) in solution. S21

**Fig. S12.** Natural transition orbital hole-particle pair for the vertical T<sub>1</sub>→S<sub>0</sub> transitions for the diplatinum cations of **2** to **4**. S22

**Table S6.** DFT-predicted vibrationally resolved phosphorescence for complexes **1** to **4** and their aggregates. S22

**Fig. S13.** Room temperature emission spectra of **1** in acetone. S23

**Fig. S14.** DFT-optimized ground state geometries of the dimers [**1**]<sub>2</sub><sup>2+</sup> and the trimer [**1**]<sub>3</sub><sup>3+</sup>, natural transition orbital hole-particle pairs for the T<sub>1</sub>→S<sub>0</sub> transitions. S24

**Figure S15.** Time-resolved photoluminescence decay profiles for **2** in CH<sub>2</sub>Cl<sub>2</sub>, acetone, MeCN, MeOH (*c* = 1 mM, room temperature). S25

**Fig. S16.** DFT-optimized ground state geometries of the dimers [**2**]<sub>2</sub><sup>2+</sup> and the trimer [**2**]<sub>3</sub><sup>3+</sup>, natural transition orbital hole-particle pairs for the T<sub>1</sub>→S<sub>0</sub> transitions. S26

**Fig. S17.** Emission spectra of optically dilute **1** to **4** in frozen (77 K) CH<sub>2</sub>Cl<sub>2</sub>:MeOH 1:1 v/v mixture. S27

**Fig. S18.** DTF-optimized ground state geometry of the dimer [**3**]<sub>2</sub><sup>2+</sup>, natural transition orbital hole-particle pairs for the T<sub>1</sub>→S<sub>0</sub> transition. S27

**Fig. S19.** Cyclic voltammograms of **1** to **4** in *n*-Bu<sub>4</sub>NPF<sub>6</sub>/DMF at a scan rate of 100 mV/s at 298 K. S28

**Table S8.** Redox potentials of the Pt(II) complexes **1** to **4** in *n*-Bu<sub>4</sub>NPF<sub>6</sub>/DMF. S28

**Figs. S20–S23.** UV-vis absorption spectra recorded during cathodic electrolysis (reduction) of compounds **1** to **4** in *n*-Bu<sub>4</sub>NPF<sub>6</sub>/DMF. S29, S30

**Figs. S24, S25.** UV-vis absorption spectra recorded during anodic electrolysis (oxidation) of compounds **3** and **4** in *n*-Bu<sub>4</sub>NPF<sub>6</sub>/DMF. S31

**References** S32

## Experimental Section

**Materials.** [Pt(phbpy)Cl] (Hphbpy = 6-phenyl-2,2'-bipyridine),<sup>1</sup> [Pt(phpytabn)Cl] (Hphpytabn = 2-(1-benzyl-1H-1,2,3-triazol-4-yl)-6-phenylpyridine),<sup>2</sup> [Pt(phpypz)Cl] (Hphpypz = 2-phenyl-6-(1H-pyrazol-1-yl)pyridine),<sup>3</sup> [Pt(phpy5apy)Cl] (Hphpyampy = *N*-pentyl-6-phenyl-*N*-(pyridin-2-yl)pyridin-2-amine)<sup>4</sup> were prepared according to published procedures. Other reagents and solvents were used as received.

### Syntheses

**General procedure for the preparation of the compounds  $[\{\text{Pt}(\text{C}^{\wedge}\text{N}^{\wedge}\text{N})\}_2(\text{CN})][\text{BAr}^{\text{F}}_4]$ .** [Pt(C<sup>^</sup>N<sup>^</sup>\*N)Cl] (0.22 mmol) was dissolved in DMSO (15 mL) and Na[BAr<sup>F</sup><sub>4</sub>] (197 mg, 0.22 mmol) was added. The mixture was stirred under nitrogen for one hour, then it was diluted with CH<sub>2</sub>Cl<sub>2</sub> (10 mL) and water (5 mL), the stirring was continued overnight in inert atmosphere. The intermediate complex [Pt(C<sup>^</sup>N<sup>^</sup>\*N)(DMSO)][BAr<sup>F</sup><sub>4</sub>] was extracted with CH<sub>2</sub>Cl<sub>2</sub> (3×10 mL), the organic phase was washed with water (4×10 mL), dried over anhydrous Na<sub>2</sub>SO<sub>4</sub>, filtered and evaporated. The resulting orange oil was dissolved in MeCN (10 mL), degassed and a solution of NaCN (5.2 mg, 0.11 mmol) in MeOH (2 mL) was added dropwise under a nitrogen atmosphere. The reaction mixture was stirred under nitrogen overnight. The solvents were removed, the crude product was purified by crystallization.

**$[\{\text{Pt}(\text{phbpy})\}_2(\text{CN})][\text{BAr}^{\text{F}}_4]$  (**1**).** Prepared from [Pt(phbpy)]Cl. Recrystallization by slow evaporation of a MeOH-toluene solution of **1** at room temperature gave dark violet microcrystalline material (91%). Single crystals suitable for XRD analysis were obtained by slow evaporation of a CH<sub>2</sub>Cl<sub>2</sub> solution of **1**. ESI-MS (*m/z*): [M]<sup>+</sup> 878.1171 (calcd. 878.1171). <sup>1</sup>H NMR (500 MHz, CD<sub>2</sub>Cl<sub>2</sub>, 0.8 mM, 298 K) δ (ppm): 8.96 (dm br, *J*<sub>HH</sub> 5.6 Hz, py, 1H), 8.89 (dm br, *J*<sub>HH</sub> 5.6 Hz, py, 1H), 8.20 (td, *J*<sub>HH</sub> 7.9 and 1.5 Hz, py, 1H), 8.05 (dd, *J*<sub>HH</sub> 7.9 and 4.0 Hz, py, 2H), 8.02 (t, *J*<sub>HH</sub> 8.1 Hz, py, 1H), 7.98 (t, *J*<sub>HH</sub> 8.1 Hz, py, 1H), 7.74–7.62 (m, BAr<sup>F</sup><sub>4</sub> + Ph/py, 15H), 7.58 (dd, *J*<sub>HH</sub> 7.5 and 1.3 Hz, py, 1H), 7.55 (s br, BAr<sup>F</sup><sub>4</sub>, 4H), 7.50–7.45 (m, 2H), 7.24 (td, *J*<sub>HH</sub> 7.4 and 1.5 Hz, py, 1H), 7.20–7.15 (m, 3H). <sup>13</sup>C{<sup>1</sup>H} NMR (100.6 MHz, acetone-*d*<sub>6</sub>, 300 K, *c* = 10 mM) δ (ppm): 166.1, 164.8, 163.5, 163.0, 162.5, 162.0, 156.2, 155.6, 155.5, 155.3, 152.3, 149.4, 146.3, 146.1, 143.2, 142.0, 141.7, 141.1, 140.8, 137.6, 135.7 (m, -BAr<sup>F</sup><sub>4</sub>), 134.2, 133.4, 132.1, 131.6, 130.2 (qm, *J*<sub>CF</sub> 31.6 Hz, -BAr<sup>F</sup><sub>4</sub>), 129.6, 128.4, 128.1, 126.9, 126.5, 126.1, 125.0, 124.9, 124.7, 124.4, 124.2, 121.5, 120.1, 119.9, 119.7, 119.6, 118.6 (m, -BAr<sup>F</sup><sub>4</sub>). <sup>195</sup>Pt{<sup>1</sup>H} NMR (86 MHz, acetone-*d*<sub>6</sub>, 300 K, *c* = 10 mM) δ (ppm): -3902 and -3534. Anal. Calcd for C<sub>65</sub>H<sub>34</sub>BF<sub>24</sub>N<sub>5</sub>Pt<sub>2</sub>: C, 44.82; H, 1.97; N 4.02. Found: C, 44.80; H, 2.04; N 4.02.

**$[\{\text{Pt}(\text{phpypz})\}_2(\text{CN})][\text{BAr}^{\text{F}}_4]$  (**2**).** Prepared from [Pt(phpypz)]Cl. Recrystallization by slow evaporation of a CH<sub>2</sub>Cl<sub>2</sub>/EtOH (1:1 v/v mixture) solution of **2** at room temperature gave a bright red

microcrystalline material (78%). ESI-MS ( $m/z$ ):  $[M]^+$  856.1051 (calcd. 856.1076).  $^1\text{H}$  NMR (500 MHz,  $\text{CD}_2\text{Cl}_2$ , 0.7 mM, 298 K)  $\delta$  (ppm): 8.28 (t,  $J_{\text{HH}}$  2.6 Hz, pz, 2H), 8.15–8.07 (m, py, 4H), 7.75 (m, 1H), 7.72 (m,  $\text{BAr}^{\text{F}_4}$ , 8H), 7.69 (d,  $J_{\text{HH}}$  8.0 Hz, 1H), 7.62 (d,  $J_{\text{HH}}$  8.0 Hz, 1H), 7.61–7.58 (m, 2H), 7.55 (m br,  $\text{BAr}^{\text{F}_4} + \text{ph}$ , 5H), 7.41 (d,  $J_{\text{HH}}$  8.3 Hz, py, 1H), 7.35 (d,  $J_{\text{HH}}$  8.3 Hz, py, 1H), 7.29 (m, 1H), 7.26–7.23 (m, 3H), 6.94 (dd,  $J_{\text{HH}}$  3.0 and 2.2 Hz, pz, 1H), 6.89 (dd,  $J_{\text{HH}}$  2.9 and 2.2 Hz, pz, 1H).  $^{13}\text{C}\{^1\text{H}\}$  NMR (125.7 MHz, acetone- $d_6$ , 300 K,  $c = 9$  mM)  $\delta$  (ppm): 164.9, 163.6, 163.3, 162.9, 162.5, 162.1, 149.1, 148.4, 146.0, 145.6, 145.4, 144.5, 143.8, 142.7, 140.7, 140.8, 138.1, 135.6 (m,  $-\text{BAr}^{\text{F}_4}$ ), 134.4, 132.6, 132.4, 132.0, 131.4, 130.1 (qm,  $J_{\text{CF}}$  31.6 Hz,  $-\text{BAr}^{\text{F}_4}$ ), 128.7, 126.7, 126.6, 126.3, 124.9, 124.8, 124.4, 122.2, 118.6 (m,  $-\text{BAr}^{\text{F}_4}$ ), 117.0, 116.7, 112.0, 111.7, 108.3, 108.0.  $^{195}\text{Pt}\{^1\text{H}\}$  NMR (86 MHz, acetone- $d_6$ , 300 K,  $c = 6$  mM)  $\delta$  (ppm): -3991 and -3579. Anal. Calcd for  $\text{C}_{61}\text{H}_{32}\text{BF}_{24}\text{N}_7\text{Pt}_2$ : C, 42.60; H, 1.88; N 5.70. Found: C, 42.04; H, 1.84; N 5.72.

**[{Pt(phpytabn)}<sub>2</sub>(CN)][BAr<sup>F</sup><sub>4</sub>] (3).** Prepared from [Pt(phpytabn)]Cl. Recrystallization by gas-phase diffusion of pentane into a  $\text{CH}_2\text{Cl}_2/\text{MeOH}$  (10:1 v/v mixture) solution of **3** gave yellow crystals (87%). ESI-MS ( $m/z$ ):  $[M]^+$  1038.1872 (calcd. 1038.1920).  $^1\text{H}$  NMR (500 MHz, acetone- $d_6$ , 298 K)  $\delta$  (ppm): 8.73 (s, triazole, 1H), 8.72 (s, triazole, 1H), 7.99 (dd,  $J_{\text{HH}}$  7.6 and 1.0 Hz, py, 1H), 7.98 (t,  $J_{\text{HH}}$  7.9 Hz, py, 1H), 7.94 (t,  $J_{\text{HH}}$  8.0 Hz, py, 1H), 7.84 (dd,  $J_{\text{HH}}$  7.6 and 1.0 Hz, py, 1H), 7.79 (m,  $\text{BAr}^{\text{F}_4}$ , 8H), 7.67 (s,  $\text{BAr}^{\text{F}_4}$ , 4H), 7.65 (d,  $J_{\text{HH}}$  6.2 Hz, Ph, 1H), 7.62 (d,  $J_{\text{HH}}$  8.8 Hz, Ph, 1H), 7.60–7.56 (m, 6H), 7.50–7.42 (m, 6H), 7.40 (dd,  $J_{\text{HH}}$  7.7 and 1.2 Hz, Ph, 1H), 7.38 (dd,  $J_{\text{HH}}$  7.7 and 1.1 Hz, Ph, 1H), 7.25 (td,  $J_{\text{HH}}$  7.4 and 1.4 Hz, Ph, 1H), 7.20 (td,  $J_{\text{HH}}$  7.4 and 1.4 Hz, Ph, 1H), 7.07 (td,  $J_{\text{HH}}$  7.5 and 1.2 Hz, Ph, 1H), 7.06 (td,  $J_{\text{HH}}$  7.5 and 1.2 Hz, Ph, 1H), 5.83 (s, 2H,  $\text{CH}_2$ ), 5.82 (s, 2H,  $\text{CH}_2$ ).  $^{13}\text{C}\{^1\text{H}\}$  NMR (125.7 MHz, acetone- $d_6$ , 298 K)  $\delta$  (ppm): 166.9, 165.7, 163.3, 162.9, 162.5, 162.1, 151.8, 150.5, 149.7, 149.1, 147.0, 146.6, 142.9, 141.9, 141.0, 140.4, 139.8, 136.0, 135.6 (m,  $-\text{BAr}^{\text{F}_4}$ ), 134.8, 134.7, 132.2, 131.6, 130.2, 130.1 (qm,  $J_{\text{CF}}$  31.6 Hz,  $-\text{BAr}^{\text{F}_4}$ ), 129.9, 129.8, 128.7, 126.5, 126.4, 126.3, 125.8, 125.4, 125.3, 125.2, 124.4, 122.2, 118.8, 118.6 (m,  $-\text{BAr}^{\text{F}_4}$ ), 118.5, 118.3, 56.7.  $^{195}\text{Pt}\{^1\text{H}\}$  NMR (86 MHz, acetone- $d_6$ , 300 K)  $\delta$  (ppm): -4019 and -3614. Anal. Calcd. for  $\text{C}_{73}\text{H}_{42}\text{BF}_{24}\text{N}_9\text{Pt}_2$ : C, 46.10; H, 2.23; N 6.63. Found: C, 46.05; H, 2.16; N 6.65.

**[{Pt(phpy5apy)}<sub>2</sub>(CN)][BAr<sup>F</sup><sub>4</sub>] (4).** Prepared from [Pt(phpy5apy)]Cl. The crude product was extracted with toluene (5 × 5 mL) and the solvent was removed. Recrystallization by slow evaporation of an EtOH/water (3:1 v/v mixture) solution of **4** at room temperature gave bright yellow-green crystals (74%). ESI-MS ( $m/z$ ):  $[M]^+$  1048.3006 (calcd. 1048.2954).  $^1\text{H}$  NMR (500 MHz, acetone- $d_6$ , 298 K)  $\delta$  (ppm): 9.27 (ddd,  $J_{\text{HH}}$  6.0, 1.8 and 0.4 Hz, py, 1H), 9.22 (ddd,  $J_{\text{HH}}$  5.9, 1.8 and 0.4 Hz, py, 1H), 8.30 (td,  $J_{\text{HH}}$  7.5 and 1.8 Hz, Ph, 1H), 8.29 (td,  $J_{\text{HH}}$  7.6 and 1.9 Hz, Ph, 1H), 8.25 (dd,  $J_{\text{HH}}$  8.0 and 7.6 Hz, Ph, 1H), 8.20 (dd,  $J_{\text{HH}}$  8.0 and 7.6 Hz, Ph, 1H), 7.97 (d,  $J_{\text{HH}}$  8.2 Hz, Ph, 1H), 7.93–7.90 (m, 3H), 7.85–7.81 (m, 3H), 7.80–7.76 (m,  $\text{BAr}^{\text{F}_4} + \text{Ph}$ , 9H), 7.69–7.5 (m,  $\text{BAr}^{\text{F}_4} + \text{Ph}$ , 5H), 7.56 (dd,

$J_{\text{HH}}$  8.4 and 0.9 Hz, Ph, 1H), 7.42 (ddd,  $J_{\text{HH}}$  7.1, 5.9 and 1.2 Hz, py, 1H), 7.37 (ddd,  $J_{\text{HH}}$  7.2, 5.9 and 1.2 Hz, py, 1H), 7.22–7.17 (m, 2H), 7.15 (td,  $J_{\text{HH}}$  7.4 and 1.5 Hz, py, 1H), 7.11 (td,  $J_{\text{HH}}$  7.4 and 1.4 Hz, py, 1H), 4.41 (m, CH<sub>2</sub>, 4H), 1.70 (m, CH<sub>2</sub>, 4H), 1.38 (m, CH<sub>2</sub>, 4H), 1.24 (m, CH<sub>2</sub>, 4H), 0.81 (m, CH<sub>3</sub>, 6H). <sup>13</sup>C{<sup>1</sup>H} NMR (125.7 MHz, acetone-*d*<sub>6</sub>, 298 K)  $\delta$  (ppm): 167.2, 165.7, 163.3, 162.9, 162.5, 162.1, 154.6, 154.2, 153.9, 153.4, 153.3, 149.4, 146.2, 142.8, 141.9, 141.8, 141.6, 141.2, 139.9, 135.6 (m, <sup>−</sup>BAr<sup>F</sup><sub>4</sub>), 135.2, 131.2, 130.5, 130.1 (qm,  $J_{\text{CF}}$  31.6 Hz, <sup>−</sup>BAr<sup>F</sup><sub>4</sub>), 128.7, 126.6, 126.0, 125.8, 125.5, 125.0, 124.4, 122.3, 121.8, 120.9, 120.3, 118.6 (m, <sup>−</sup>BAr<sup>F</sup><sub>4</sub>), 116.6, 116.5, 114.9, 114.8, 55.0, 29.3, 28.5, 22.8, 14.4. <sup>195</sup>Pt{<sup>1</sup>H} NMR (86 MHz, acetone-*d*<sub>6</sub>, 300 K)  $\delta$  (ppm): −3852 and −3457. Anal. Calcd. for C<sub>75</sub>H<sub>56</sub>BF<sub>24</sub>N<sub>7</sub>Pt<sub>2</sub>: C, 47.11; H, 2.95; N 5.13. Found: C, 46.29; H, 2.70; N 4.97.

### Instrumentation

The solution <sup>1</sup>H, <sup>13</sup>C{<sup>1</sup>H}, <sup>195</sup>Pt{<sup>1</sup>H} NMR spectra were recorded on a Bruker Avance III 400 and a JEOL-500 MHz spectrometers. CHN Microanalyses were carried out on an Elementar Vario Micro Cube instrument at the analytical laboratory of the University of Eastern Finland.

**Electrochemistry.** Cyclic voltammetry measurements were carried out in 0.1 M *n*Bu<sub>4</sub>NPF<sub>6</sub>/DMF solution at 298 K and at 100 mV/s scan rate, using a three-electrode configuration (glassy carbon working electrode, Pt counter electrode, Ag/AgCl pseudo-reference electrode) and a Metrohm  $\mu$ Stat400 potentiostat. The potentials were referenced against the ferrocene/ferrocenium redox couple as internal standard. UV-vis-spectroelectrochemical measurements (in 0.1 M *n*Bu<sub>4</sub>NPF<sub>6</sub>/DMF solution, at 298 K) were performed using an optically transparent thin-layer electrode (OTTLE) cell,<sup>5</sup> a Cary 50 scan spectrophotometer, and a Metrohm Autolab PGSTAT30 potentiostat and function generator.

**X-ray diffractometric structural analysis.** The crystals of **1**, **2**, **3**·CH<sub>2</sub>Cl<sub>2</sub> and **4**, were collected from CH<sub>2</sub>Cl<sub>2</sub>, pentane/CH<sub>2</sub>Cl<sub>2</sub>/MeOH, and EtOH/water solutions, respectively. They were immersed in cryo-oil, mounted in a Nylon loop, and measured at  $T = 150$  K. The X-ray diffraction data were collected with a Bruker Kappa Apex II diffractometer using Mo K $\alpha$  ( $\lambda = 0.71073$  Å) radiation. The APEX<sup>6</sup> program package was used for cell refinements and data reductions. A numerical or semiempirical absorption correction (SADABS)<sup>7</sup> was applied to all data. The structures were solved by direct methods using the SHELXS-2018<sup>8</sup> program with the WinGX<sup>9</sup> graphical user interface. Structural refinements were carried out using SHELXL-2018.<sup>8</sup>

The diplatinum cations of **1** and **2** were disordered between two close positions and modeled with occupancies of 0.49/0.51 and 0.44/0.56. The crystallographic disorder is likely accompanied by

chemical disorder (i.e. two possible orientations of cyclometalated C<sup>N</sup>N and cyanide ligands). Due to these features, a series of geometry and displacement constraints and restraints were applied to the ligands. In addition, several CF<sub>3</sub> groups of the borate anion were disordered too.

In **3**·CH<sub>2</sub>Cl<sub>2</sub> and **4**, the carbon and nitrogen atoms of the cyanide group were refined with occupancies of 0.5 being placed in the same position.

All non-H atoms were anisotropically refined, and all hydrogen atoms were positioned geometrically and constrained to ride on their respective parent atoms with C–H = 0.95–0.99 Å and *U*<sub>iso</sub> = 1.2–1.5*U*<sub>equiv</sub> (parent atom). The crystallographic details are summarized in Table S1.

**Photophysical studies.** Absorption spectra were measured with a Shimadzu UV-3600 I plus UV-vis-NIR spectrophotometer. For all absorption measurements, matched quartz (Hellma®) cuvettes were used.

Steady-state excitation and emission spectra were recorded on a FluoTime 300 spectrometer from PicoQuant equipped with a 300 W ozone-free Xe lamp (250–900 nm), a 10 W Xe flash-lamp (250–900 nm, pulse width *ca.* 1 μs) with repetition rates of 0.1 to 300 Hz, a double-grating excitation monochromator (Czerny-Turner type, grating with 1200 lines/mm, blaze wavelength: 300 nm), diode lasers (pulse width < 80 ps) operated by a computer-controlled laser driver PDL-828 “Sepia II” (repetition rate up to 80 MHz, burst mode for slow and weak decays), two double-grating emission monochromators (Czerny-Turner, selectable gratings blazed at 500 nm with 2.7 nm/mm dispersion and 1200 lines/mm, or blazed at 1200 nm with 5.4 nm/mm dispersion and 600 lines/mm) with adjustable slit width between 25 μm and 7 mm, Glan-Thompson polarizers for excitation (after the Xe-lamps) and emission (after the sample). Different sample holders (Peltier-cooled mounting unit ranging from –15 to 110 °C or an adjustable front-face sample holder), along with two detectors (namely a PMA Hybrid-07 from PicoQuant with transit time spread FWHM < 50 ps, 200–850 nm, or a H10330C-45-C3 NIR detector with transit time spread FWHM 0.4 ns, 950–1700 nm from Hamamatsu) were used. Steady-state spectra and photoluminescence lifetimes were recorded in the TCSPC mode by a PicoHarp 300 (minimum base resolution 4 ps) or in the MCS mode by a TimeHarp 260 (where up to several ms can be traced). Emission and excitation spectra were corrected for source intensity (lamp and grating) by standard correction curves. For samples with lifetimes in the ns order, an instrument response function calibration (IRF) was performed using a diluted Ludox® dispersion. Lifetime analysis was performed using the commercial EasyTau 2 software (PicoQuant). The quality of the fit was assessed by minimizing the reduced chi squared function ( $\chi^2$ ) and visual inspection of the weighted residuals and their autocorrelation. All solvents used were of spectrometric grade (Uvasol®, Merck).

Photoluminescence (PL) quantum yields were measured with a Hamamatsu Photonics absolute PL quantum yield measurement system (C9920-02) equipped with a L9799-01 CW Xe light source (150 W), a monochromator, a C7473 photonic multi-channel analyzer, an integrating sphere and employing U6039-05 software (Hamamatsu Photonics, Ltd., Shizuoka, Japan).

Uncertainties of  $k_r$  and  $k_{nr}$  were calculated as

$$\Delta k_R = \left( \frac{\Delta \Phi_{L(avgd)}}{\tau_{amp(avgd)}} \right) + \left( \frac{\Delta \tau_{amp(avgd)}}{\tau_{amp(avgd)}^2} \Phi_{L(avgd)} \right)$$

$$\Delta k_{NR} = \left( \frac{\Delta \tau_{amp(avgd)}}{\tau_{amp(avgd)}^2} \right) + \left( \frac{\Delta \Phi_{L(avgd)}}{\tau_{amp(avgd)}} \right) + \left( \frac{\Delta \tau_{amp(avgd)}}{\tau_{amp(avgd)}^2} \Phi_{L(avgd)} \right).$$

For measurements of fluid solutions (diluted optically to  $A < 0.1$ ) and frozen glassy matrices, round cuvettes made from quartz were used. The solids were measured using quartz NMR tubes.

**Computational details.** Single molecule models for cations **1–4** were optimized in the ground state and first excited triplet state at the (TD-)DFT level of theory. Optimizations for aggregated models were carried out using coordinates from crystallographically determined structures with a QM/MM approach.<sup>10</sup> In the QM/MM optimizations, the crystal structures were expanded in three dimensions and one dimer from the middle of the supercell was assigned as the QM part and treated with DFT, while the surroundings were treated with a simple force field (UFF)<sup>11</sup> and kept frozen during the optimization. In addition, free optimization of dimeric and trimeric aggregates of **1** and **2** starting from head-to-tail orientation of cyclometalated fragments was performed. Triplet state structures of aggregated models were optimized with unrestricted DFT formalism. Single-point TD-DFT calculations were performed for each of the optimized structures to study the excitation/emission behavior. All calculations were done with the Gaussian 16 program package.<sup>12</sup> The meta-hybrid MN15<sup>13</sup> functional was used for all calculations, combined with the def2-TZVPP basis set, and the corresponding ECP (effective core potential) for platinum atoms, whereas lighter atoms were treated with the def2-SVP basis set.<sup>14</sup> The conductor-like polarizable continuum model (C-PCM)<sup>15</sup> with CH<sub>2</sub>Cl<sub>2</sub> solvation was used to describe the solvent effects. Vibrationally resolved phosphorescence spectra were also calculated for the monomeric models at the Franck-Condon limit with exact Hessians calculated for both the ground and excited state (AdiabaticHessian mode). Time-Dependent formalism was used to calculate the band shape with a temperature of 298 K.

## Supporting Tables and Figures

**Table S1.** Crystal data and structure refinement for **1**, **2**, **3**·CH<sub>2</sub>Cl<sub>2</sub> and **4**.

|                                        | <b>1</b>                                                                                        | <b>2</b>                                                                        | <b>3</b> ·CH <sub>2</sub> Cl <sub>2</sub>                                                       | <b>4</b>                                                                                         |
|----------------------------------------|-------------------------------------------------------------------------------------------------|---------------------------------------------------------------------------------|-------------------------------------------------------------------------------------------------|--------------------------------------------------------------------------------------------------|
| CCDC                                   | 2285471                                                                                         | 2285472                                                                         | 2285473                                                                                         | 2285474                                                                                          |
| Empirical formula                      | C <sub>130</sub> H <sub>68</sub> B <sub>2</sub> F <sub>48</sub> N <sub>10</sub> Pt <sub>4</sub> | C <sub>61</sub> H <sub>32</sub> BF <sub>24</sub> N <sub>7</sub> Pt <sub>2</sub> | C <sub>74</sub> H <sub>44</sub> BCl <sub>2</sub> F <sub>24</sub> N <sub>9</sub> Pt <sub>2</sub> | C <sub>150</sub> H <sub>112</sub> B <sub>2</sub> F <sub>48</sub> N <sub>14</sub> Pt <sub>4</sub> |
| Formula weight                         | 3483.92                                                                                         | 1719.92                                                                         | 1987.07                                                                                         | 3824.51                                                                                          |
| Temperature (K)                        | 150(2)                                                                                          |                                                                                 |                                                                                                 |                                                                                                  |
| Wavelength (Å)                         | 0.71073                                                                                         |                                                                                 |                                                                                                 |                                                                                                  |
| Crystal system                         | monoclinic                                                                                      | monoclinic                                                                      | triclinic                                                                                       | triclinic                                                                                        |
| Space group                            | <i>C2/c</i>                                                                                     | <i>C2/c</i>                                                                     | <i>P</i> 1                                                                                      | <i>P</i> 1                                                                                       |
| Unit cell dimensions                   |                                                                                                 |                                                                                 |                                                                                                 |                                                                                                  |
| a (Å)                                  | 37.877(4)                                                                                       | 37.583(4)                                                                       | 10.8326(5)                                                                                      | 19.0654(6)                                                                                       |
| b (Å)                                  | 19.7175(19)                                                                                     | 19.550(2)                                                                       | 18.8796(9)                                                                                      | 21.3165(7)                                                                                       |
| c (Å)                                  | 16.623(2)                                                                                       | 16.6042(19)                                                                     | 20.8423(11)                                                                                     | 22.1528(8)                                                                                       |
| a (°)                                  | 90                                                                                              | 90                                                                              | 63.426(2)                                                                                       | 61.9080(10)                                                                                      |
| β (°)                                  | 102.157(11)                                                                                     | 103.385(2)                                                                      | 78.863(2)                                                                                       | 86.4950(10)                                                                                      |
| γ (°)                                  | 90                                                                                              | 90                                                                              | 73.683(2)                                                                                       | 65.2190(10)                                                                                      |
| Volume (Å <sup>3</sup> )               | 12136(2)                                                                                        | 11869(2)                                                                        | 3647.4(3)                                                                                       | 7106.0(4)                                                                                        |
| Z                                      | 4                                                                                               | 8                                                                               | 2                                                                                               | 2                                                                                                |
| ρ <sub>calc</sub> (Mg/m <sup>3</sup> ) | 1.907                                                                                           | 1.925                                                                           | 1.809                                                                                           | 1.787                                                                                            |
| μ (mm <sup>-1</sup> )                  | 4.727                                                                                           | 4.833                                                                           | 4.017                                                                                           | 4.046                                                                                            |
| F(000)                                 | 6688                                                                                            | 6592                                                                            | 1924                                                                                            | 3728                                                                                             |
| Crystal size (mm <sup>3</sup> )        | 0.310 × 0.252 × 0.136                                                                           | 0.367 × 0.292 × 0.162                                                           | 0.703 × 0.263 × 0.106                                                                           | 0.411 × 0.349 × 0.244                                                                            |
| θ range for data collection (°)        | 2.119 to 28.929                                                                                 | 2.119 to 25.999                                                                 | 1.965 to 35.00                                                                                  | 2.146 to 28.000                                                                                  |
| Index ranges                           | -50 ≤ h ≤ 47,<br>-26 ≤ k ≤ 25,<br>-21 ≤ l ≤ 21                                                  | -46 ≤ h ≤ 46,<br>-24 ≤ k ≤ 24,<br>-20 ≤ l ≤ 20                                  | -12 ≤ h ≤ 17,<br>-30 ≤ k ≤ 28,<br>-33 ≤ l ≤ 30                                                  | -25 ≤ h ≤ 25,<br>-27 ≤ k ≤ 28,<br>-29 ≤ l ≤ 29                                                   |
| Reflections collected                  | 83879                                                                                           | 39691                                                                           | 110532                                                                                          | 128978                                                                                           |
| Independent reflections                | 15218                                                                                           | 11622                                                                           | 32025                                                                                           | 34259                                                                                            |
| R <sub>int</sub>                       | 0.0311                                                                                          | 0.0301                                                                          | 0.0238                                                                                          | 0.0232                                                                                           |
| Completeness to θ = 25.24°             | 99.9%                                                                                           | 99.7%                                                                           | 99.9%                                                                                           | 99.8%                                                                                            |
| Absorption correction                  | Numerical                                                                                       |                                                                                 |                                                                                                 |                                                                                                  |
| Max. and min. transmission             | 0.566 and 0.322                                                                                 | 0.508 and 0.270                                                                 | 0.675 and 0.165                                                                                 | 0.438 and 0.287                                                                                  |



|                                                                                                                                                                                                                                                      |                              |                              |                              |                              |
|------------------------------------------------------------------------------------------------------------------------------------------------------------------------------------------------------------------------------------------------------|------------------------------|------------------------------|------------------------------|------------------------------|
| Data/ restraints/<br>parameters                                                                                                                                                                                                                      | 15218 / 213 / 974            | 11622 / 348 / 903            | 32025 / 60 / 1065            | 34259 / 192 / 2041           |
| GOOF on F <sup>2</sup>                                                                                                                                                                                                                               | 1.284                        | 1.045                        | 1.007                        | 1.027                        |
| Final R indices<br>[I>2σ(I)] <sup>a</sup>                                                                                                                                                                                                            | R1 = 0.0719, wR2 =<br>0.1455 | R1 = 0.0817, wR2 =<br>0.1870 | R1 = 0.0260, wR2 =<br>0.0605 | R1 = 0.0290, wR2 =<br>0.0638 |
| R indices (all data)                                                                                                                                                                                                                                 | R1 = 0.0897, wR2 =<br>0.1514 | R1 = 0.1150, wR2 =<br>0.2085 | R1 = 0.0393, wR2 =<br>0.0662 | R1 = 0.0429, wR2 =<br>0.0713 |
| Largest diff. peak and<br>hole (e.Å <sup>-3</sup> )                                                                                                                                                                                                  | 2.322 and -2.925             | 4.563 and -2.840             | 1.756 and -1.839             | 2.146 and -1.780             |
| <sup>a</sup> R <sub>1</sub> = Σ  F <sub>o</sub>   -  F <sub>c</sub>   /Σ F <sub>o</sub>  ; wR2 = [Σ [w(F <sub>o</sub> <sup>2</sup> - F <sub>c</sub> <sup>2</sup> ) <sup>2</sup> ] / Σ[w(F <sub>o</sub> <sup>2</sup> ) <sup>2</sup> ]] <sup>1/2</sup> |                              |                              |                              |                              |

**Table S2.** Selected bond lengths (Å) and angles (°) for complexes **1**, **3**·CH<sub>2</sub>Cl<sub>2</sub> and **4**.

|                                    | <b>1</b>                                             | <b>3</b> ·CH <sub>2</sub> Cl <sub>2</sub> | <b>4</b>                                             |
|------------------------------------|------------------------------------------------------|-------------------------------------------|------------------------------------------------------|
| <b>Bond lengths, Å</b>             |                                                      |                                           |                                                      |
| Pt–C <sub>CN</sub> (1)             | 2.05(5)<br>1.97(7)                                   | 1.9440(19)<br>1.9452(17)                  | 1.953(3)<br>1.955(3)<br>1.949(3)<br>1.961(3)         |
| Pt–N <sub>CN</sub> (1)             | 1.99(6)<br>1.95(3)                                   | 1.9440(19)<br>1.9452(17)                  | 1.953(5)<br>1.955(4)<br>1.949(3)<br>1.961(3)         |
| C(1)–N(1)                          | 1.07(4)<br>1.17(6)                                   | 1.152(4)<br>1.150(3)                      | 1.156(7)<br>1.155(6)<br>1.160(5)                     |
| Pt(1)–C(2)                         | 2.022(8)<br>2.01(3)<br>2.052(10)<br>2.052(8)         | 1.986(2)<br>1.989(2)                      | 1.993(4)<br>1.980(4)<br>1.990(4)<br>1.983(4)         |
| Pt(1)–N(2)                         | 1.908(7)<br>1.94(2)<br>1.923(8)<br>1.944(7)          | 1.9766(17)<br>1.9738(15)                  | 2.009(3)<br>2.007(3)<br>1.997(3)<br>2.010(3)         |
| Pt(1)–N(3)                         | 2.110(8)<br>2.102(14)<br>2.083(10)<br>2.085(8)       | 2.1034(17)<br>2.0892(17)                  | 2.093(3)<br>2.105(3)<br>2.102(3)<br>2.097(3)         |
| Pt–Pt                              | 3.1925(18)<br>3.2575(30)<br>3.4168(26)<br>3.7064(27) | 3.2944(4)                                 | 3.6753(6)<br>3.8157(6)                               |
| <b>Bond angles, °</b>              |                                                      |                                           |                                                      |
| N(1)–C(1)–Pt(1)<br>C(1)–N(1)–Pt(2) | 169(3)<br>174(5)<br>168(4)<br>178(5)                 | 177.8(3)<br>178.8(2)                      | 173.1(5)<br>175.1(4)<br>178.1(3)<br>170.9(3)         |
| C(1)–Pt(1)–N(2)<br>N(1)–Pt(2)–N(4) | 174.9(11)<br>177(2)<br>175.7(12)<br>175.9(13)        | 177.36(8)<br>179.15(7)                    | 170.56(14)<br>172.41(13)<br>175.43(12)<br>170.36(13) |
| C(2)–Pt(1)–N(3)                    | 159.8(4)<br>160.7(8)<br>159.5(6)<br>159.2(4)         | 161.04(8)<br>160.88(7)                    | 167.54(15)<br>168.59(13)<br>168.72(14)<br>166.65(13) |

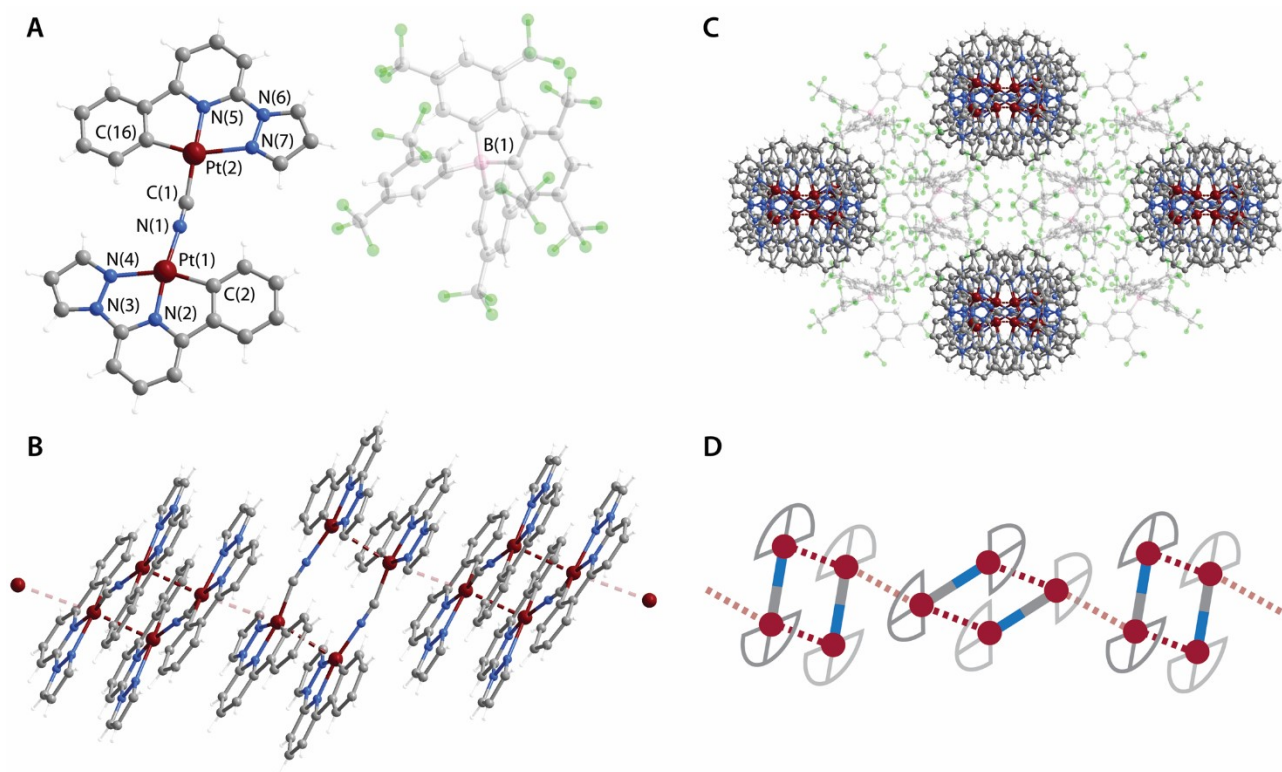

**Fig. S1.** (A) Molecular view of complex **2** (ball and stick mode, one of the disordered components); (B, D) depiction of the columnar stacks formed by the cations; (C) fragment of crystal packing of **2**, the view is along the columnar stacks of the cations (*c* direction).

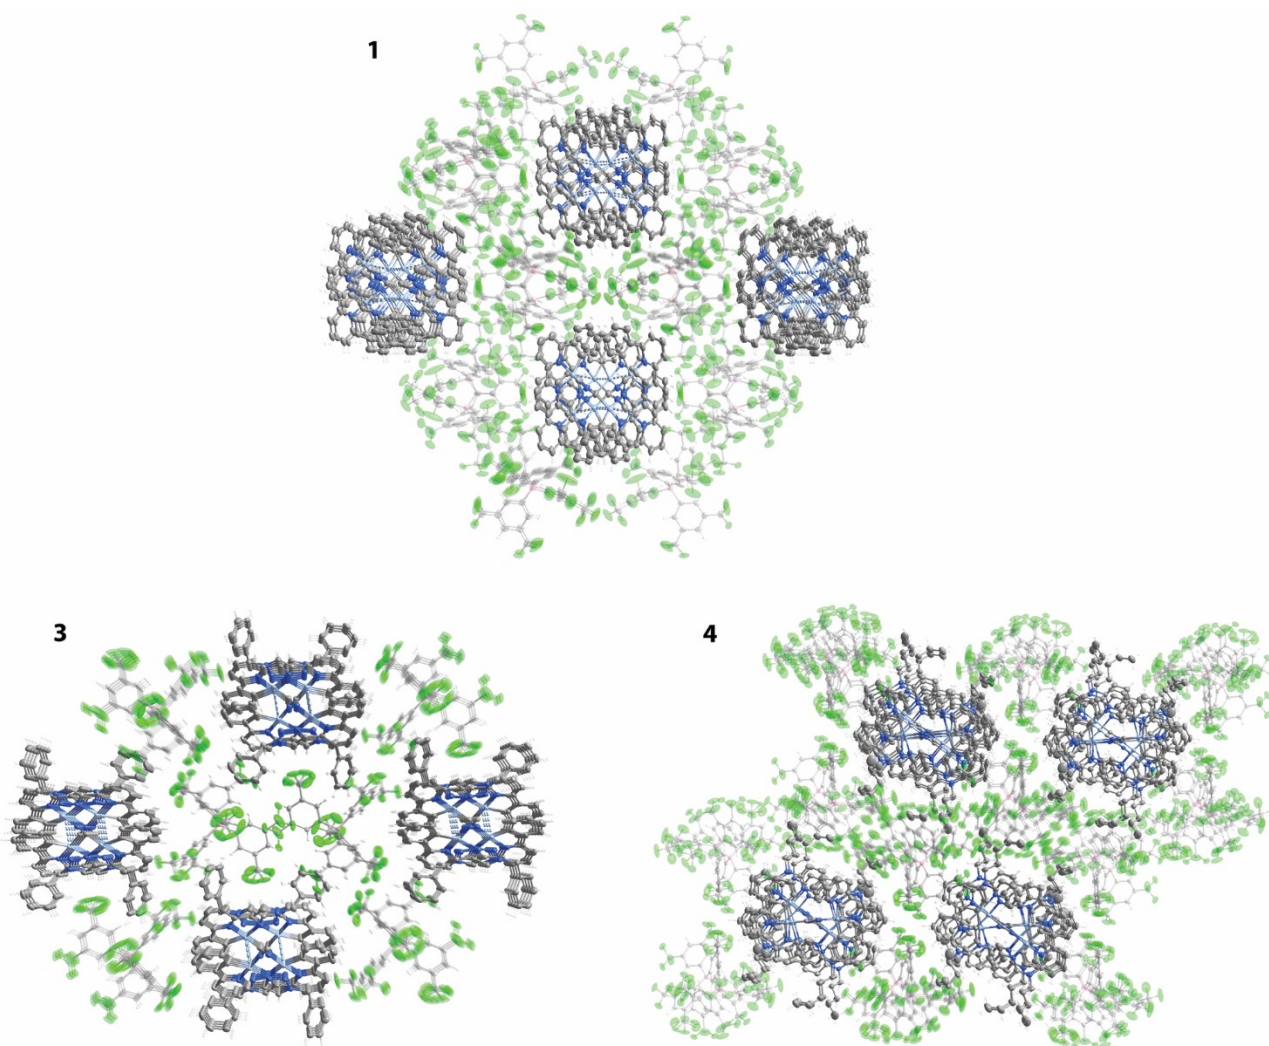

**Fig. S2.** Fragments of crystal packing for compounds **1**, **3**·CH<sub>2</sub>Cl<sub>2</sub>, and **4**, the views are along the columnar stacks of the cations (*c* direction for **1**, *a* direction for **3**·CH<sub>2</sub>Cl<sub>2</sub>, and **4**).

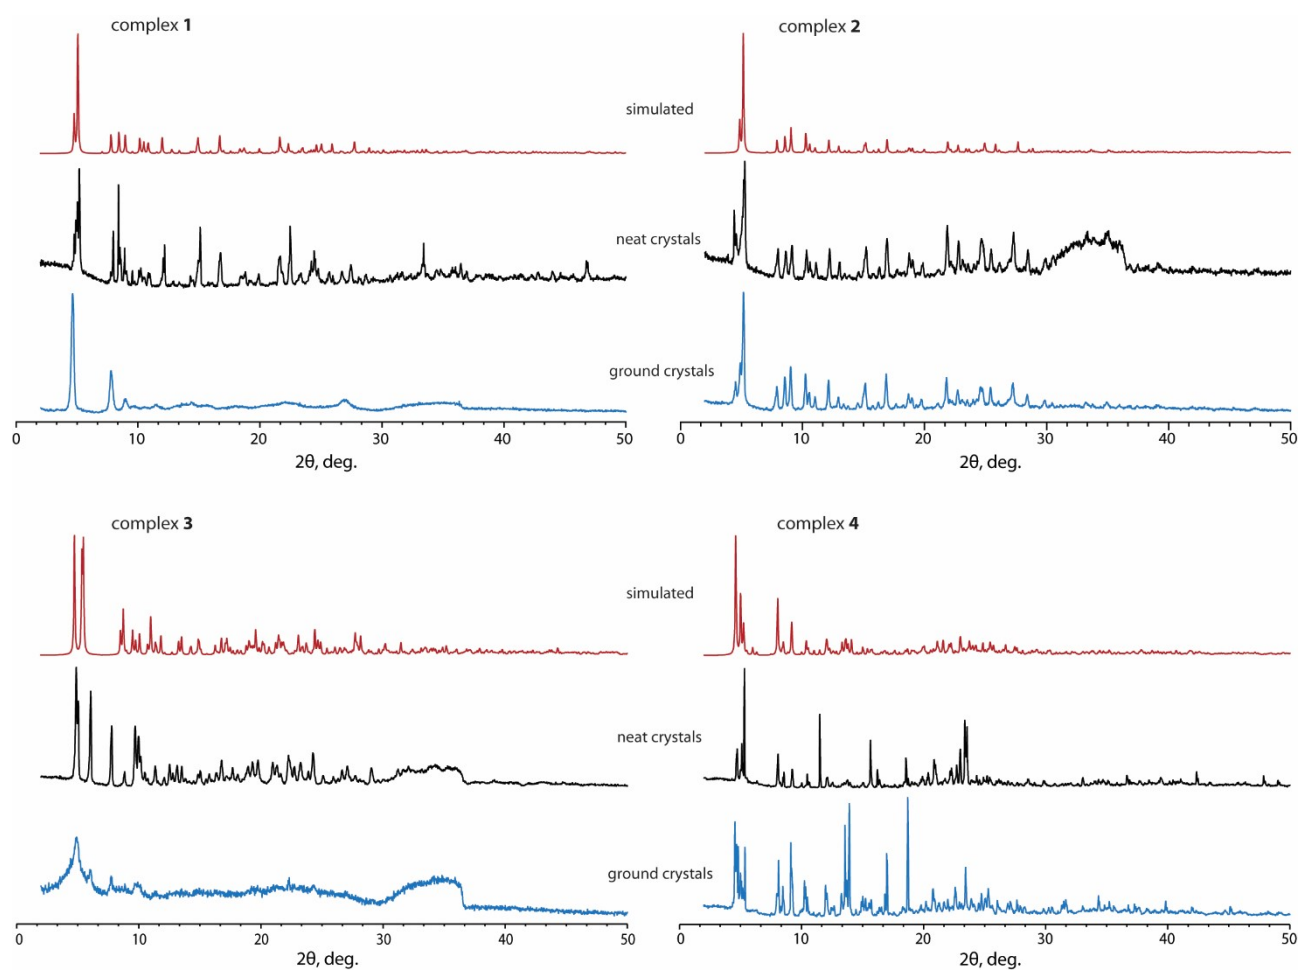

**Fig. S3.** Simulated and experimental powder XRD patterns for crystalline and ground samples of **1** to **4** (the region of  $2\theta$  between  $30\text{--}36^\circ$  shows an increased background, at high voltages and low intensity of diffraction the energy resolution of the scintillation counter is insufficient to discriminate this).

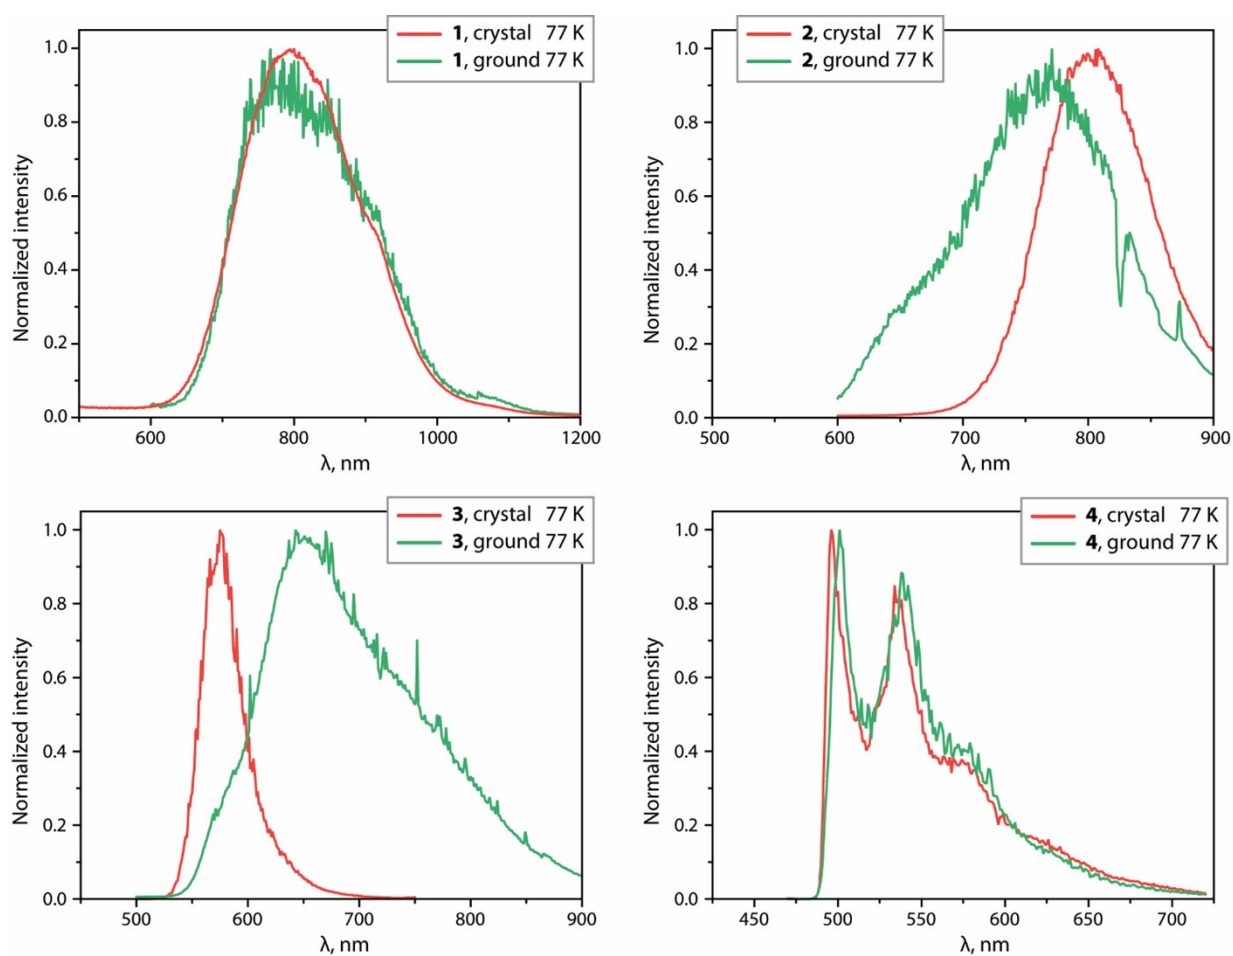

**Fig. S4.** Normalized photoluminescence spectra of compounds **1** to **4** in the solid state at 77 K ( $\lambda_{\text{exc}} = 375$  nm, solvent-free vacuum dried solids).

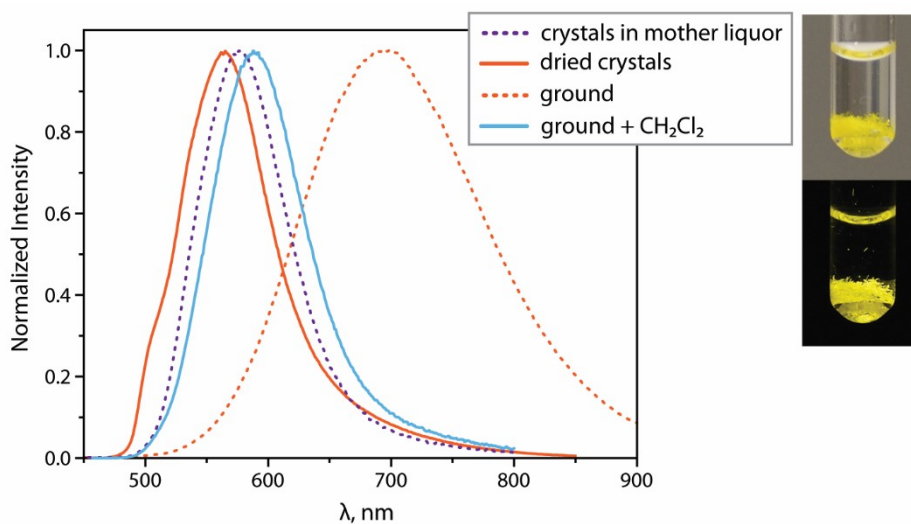

**Fig. S5.** Normalized photoluminescence spectra of complex **3**: solvated crystals  $\mathbf{3} \cdot \text{CH}_2\text{Cl}_2$ , dried solvent-free crystals, ground material, and treated with a drop of  $\text{CH}_2\text{Cl}_2$  after grinding at 298 K ( $\lambda_{\text{exc}}$

= 375 nm; the inset photos show the appearance of crystalline **3**CH<sub>2</sub>Cl<sub>2</sub> preserved in mother liquor under ambient and 365 nm UV light.

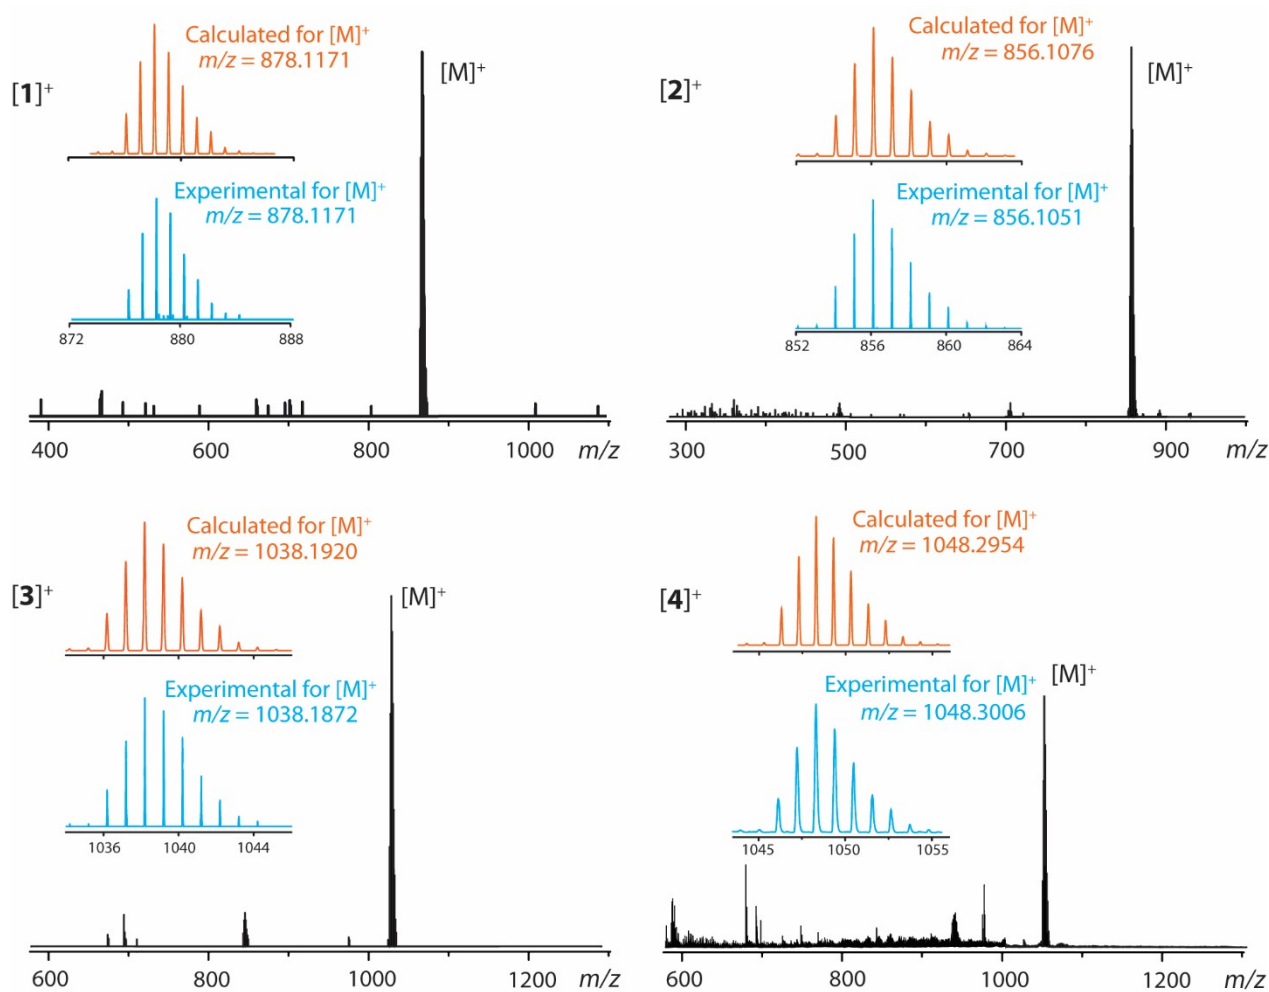

**Fig. S6.** ESI-MS of compounds **1** to **4**.



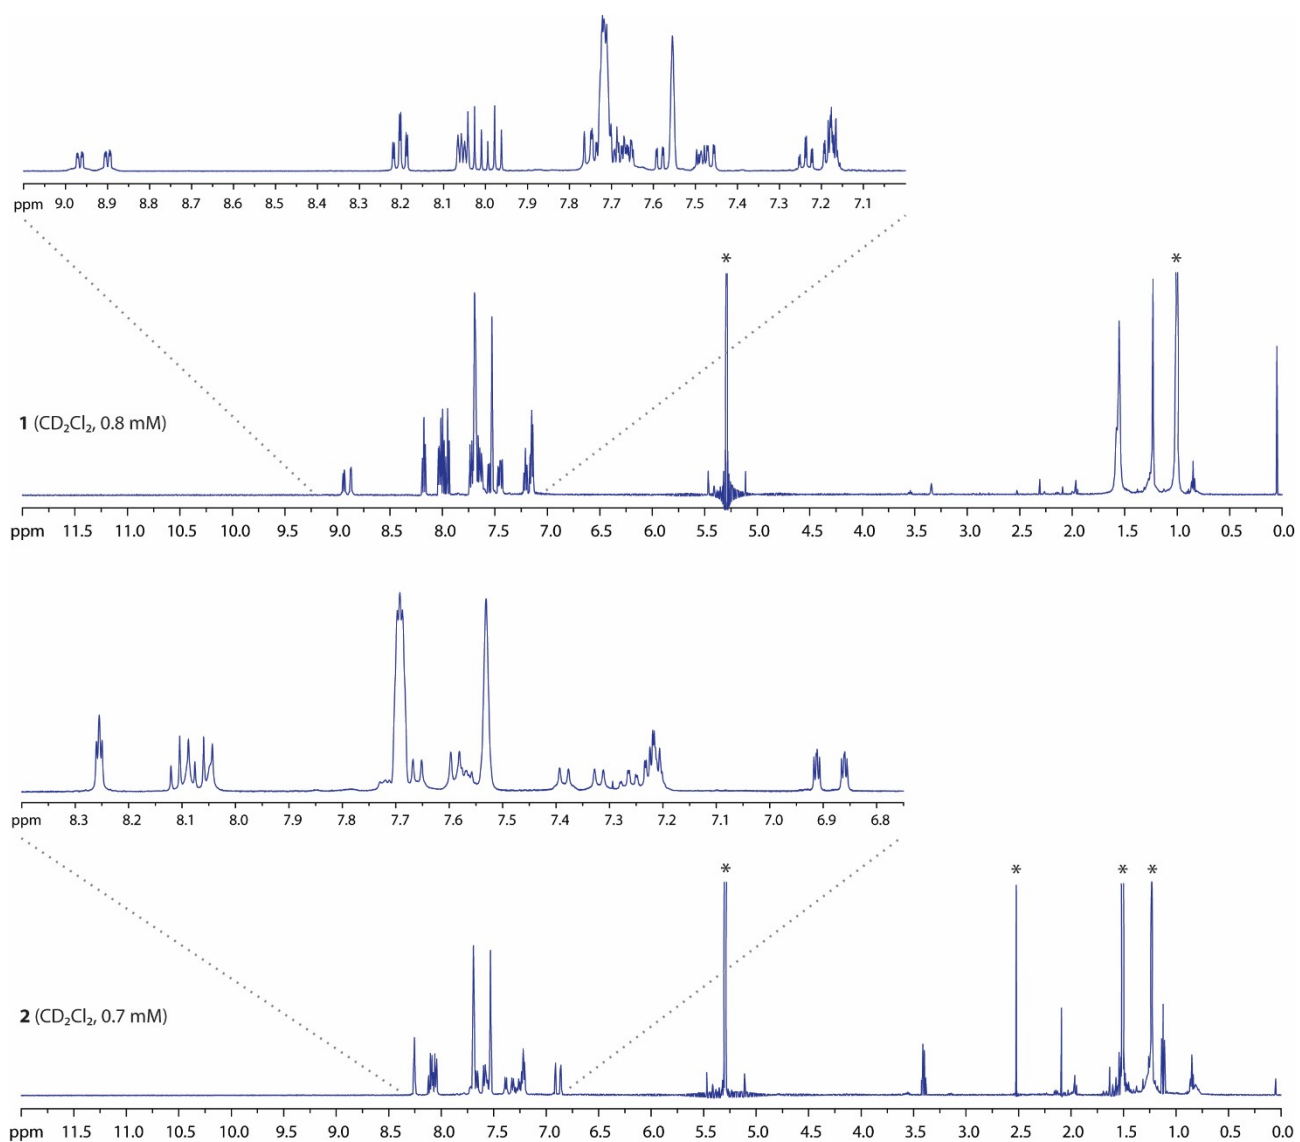

**Fig. S7.** 500 MHz <sup>1</sup>H NMR spectra of compounds **1** and **2** (CD<sub>2</sub>Cl<sub>2</sub>, 293 K; signals of high intensity from residual solvent/admixture have been cut and indicated with asterisks).



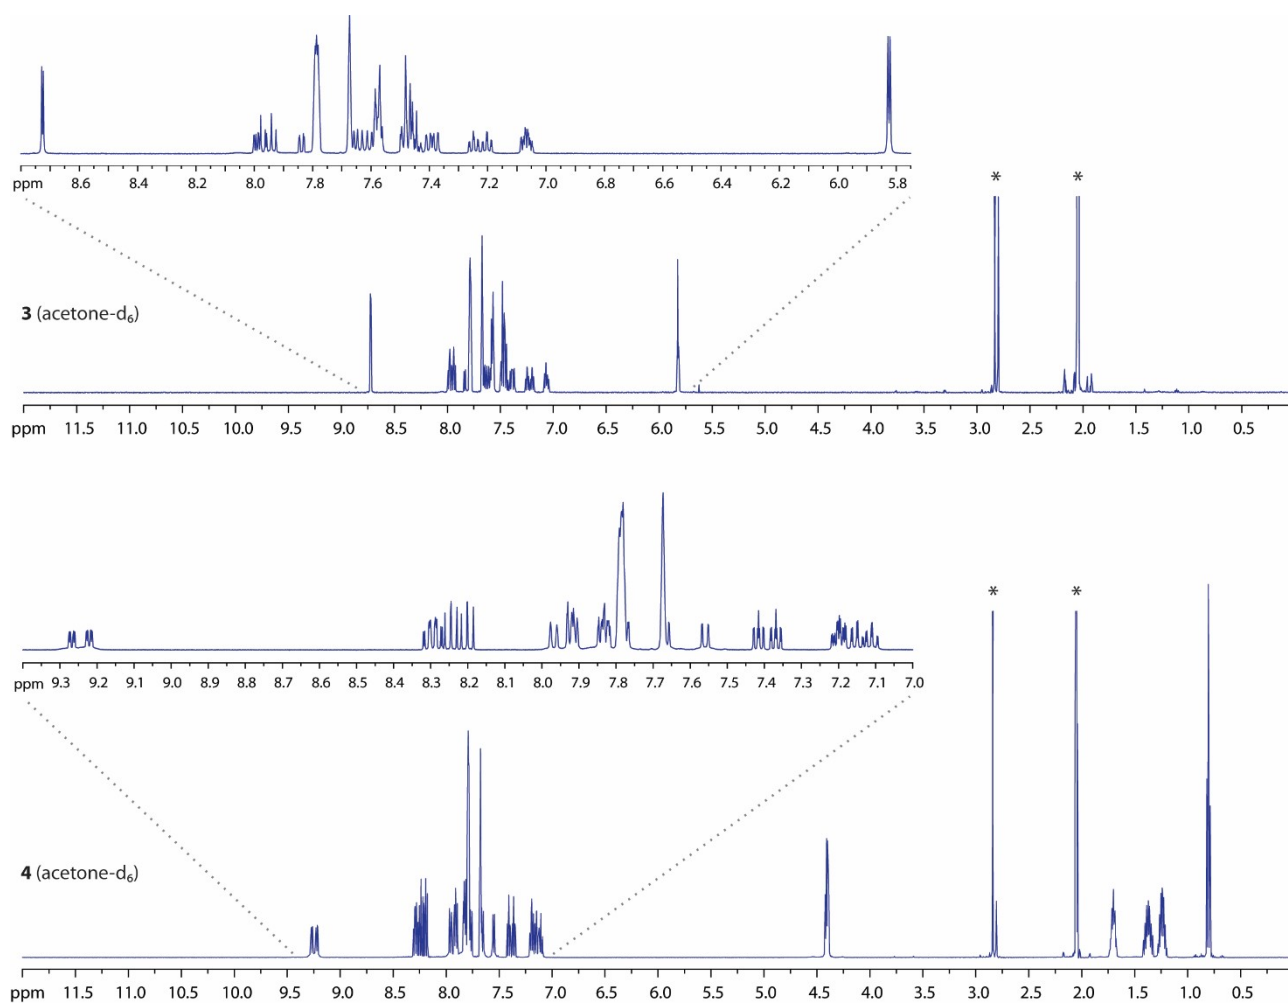

**Fig. S8.** 500 MHz <sup>1</sup>H NMR spectra of compounds **3** and **4** (acetone-*d*<sub>6</sub>, 293 K; signals of high intensity from residual solvent/admixture have been cut and indicated with asterisks).

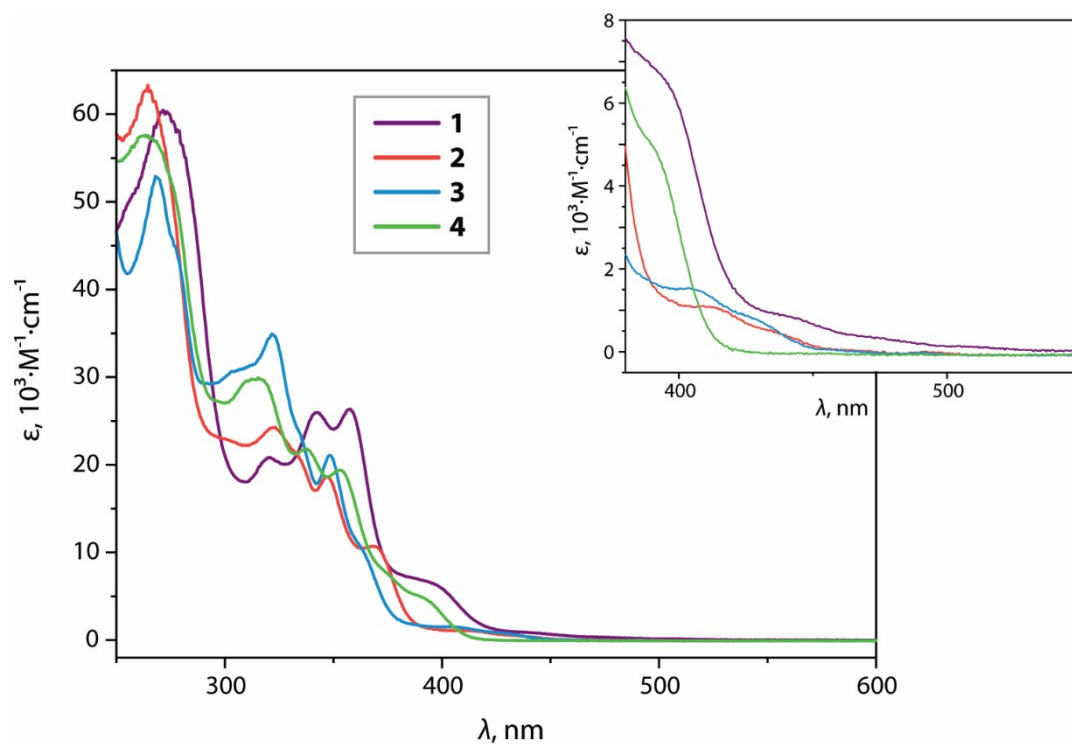

**Fig. S9.** UV-vis absorption spectra of compounds **1** to **4** in CH<sub>2</sub>Cl<sub>2</sub> at 298 K.

**Table S3.** UV-vis absorption maxima of compounds **1** to **4**.<sup>a</sup>

| Compound | $\lambda_{\text{abs}}$ , nm ( $\epsilon$ , $10^{-3} \text{ M}^{-1} \text{ cm}^{-1}$ )            | $\Delta E$ (eV) <sup>b</sup> |
|----------|--------------------------------------------------------------------------------------------------|------------------------------|
| <b>1</b> | 272 (60.5), 320 (20.8), 342 (25.9), 358 (26.3), 392sh (6.3), 443 (0.8), 470sh (0.4), 523sh (0.2) | 2.37                         |
| <b>2</b> | 265 (62.8), 323 (24.3), 347 (18.6), 368 (10.7), 412 (1.3), 420sh (0.8)                           | 2.95                         |
| <b>3</b> | 268 (53.0), 322 (34.9), 349 (21.0), 405 (1.6), 417sh (1.0)                                       | 2.97                         |
| <b>4</b> | 263 (57.7), 315 (30.0), 337 (21.8), 353 (19.4), 390sh (5.0)                                      | 3.18                         |

<sup>a</sup> Measured in CH<sub>2</sub>Cl<sub>2</sub>; <sup>b</sup> optical HOMO-LUMO gap calculated from the long-wavelength absorption bands at lowest energy.

**Table S4.** TD-DFT-calculated lowest-lying singlet-singlet vertical excitations and lowest singlet-triplet vertical excitations for diplatinum cations of **1** to **4** in CH<sub>2</sub>Cl<sub>2</sub>.

| Complex  | Transition                     | E, eV | $\lambda$ , nm | $f^a$  | Contributions <sup>b</sup>                     | Assignment |
|----------|--------------------------------|-------|----------------|--------|------------------------------------------------|------------|
| <b>1</b> | S <sub>0</sub> →S <sub>1</sub> | 3.06  | 405            | 0.0010 | 59% H→L+1, 30% H→L                             | MLCT/IL    |
|          | S <sub>0</sub> →S <sub>2</sub> | 3.09  | 402            | 0.0003 | 73% H-1→L, 17% H-1→L+1                         | MLCT/IL    |
|          | S <sub>0</sub> →S <sub>3</sub> | 3.63  | 342            | 0.0305 | 31% H-6→L+1, 12% H-6→L                         | MLCT       |
|          | S <sub>0</sub> →S <sub>4</sub> | 3.65  | 340            | 0.1553 | 40% H-2→L, 26% H-2→L+1                         | MLCT/LLCT  |
|          | S <sub>0</sub> →S <sub>5</sub> | 3.72  | 333            | 0.0286 | 52% H-7→L, 15% H-7→L+1, 13% H-6→L              | MLCT       |
|          | S <sub>0</sub> →T <sub>1</sub> | 2.70  | 460            | -      | 45% H→L+1, 22% H→L, 16% H→L+3                  | MLCT/IL    |
|          | S <sub>0</sub> →T <sub>2</sub> | 2.71  | 458            | -      | 56% H-1→L, 14% H-1→L+2, 13% H-1→L+1            | MLCT/IL    |
| <b>2</b> | S <sub>0</sub> →S <sub>1</sub> | 3.29  | 377            | 0.0156 | 93% H→L+1                                      | MLCT/IL    |
|          | S <sub>0</sub> →S <sub>2</sub> | 3.31  | 374            | 0.0196 | 94% H-1→L                                      | MLCT/IL    |
|          | S <sub>0</sub> →S <sub>3</sub> | 3.93  | 315            | 0.0320 | 53% H-6→L+1, 35.7% H-5→L+1                     | MLCT       |
|          | S <sub>0</sub> →S <sub>4</sub> | 3.98  | 311            | 0.0150 | 43% H→L+3, 30% H-4→L+1, 15% H-2→L+1            | MLCT/LLCT  |
|          | S <sub>0</sub> →S <sub>5</sub> | 4.01  | 309            | 0.0418 | 80% H-7→L, 7.32% H-4→L                         | MLCT       |
|          | S <sub>0</sub> →T <sub>1</sub> | 2.78  | 446            | -      | 56% H→L+1, 15% H→L+3                           | MLCT/IL    |
|          | S <sub>0</sub> →T <sub>2</sub> | 2.79  | 444            | -      | 58% H-1→L, 15% H-1→L+2                         | MLCT/IL    |
| <b>3</b> | S <sub>0</sub> →S <sub>1</sub> | 3.25  | 382            | 0.0112 | 64% H→L+1, 30% H→L                             | MLCT/IL    |
|          | S <sub>0</sub> →S <sub>2</sub> | 3.27  | 380            | 0.0132 | 76% H-1→L, 19% H-1→L+1                         | MLCT/IL    |
|          | S <sub>0</sub> →S <sub>3</sub> | 3.87  | 321            | 0.0286 | 32% H-6→L+1, 25% H-5→L+1, 14% H-5→L, 12% H-6→L | MLCT       |
|          | S <sub>0</sub> →S <sub>4</sub> | 3.91  | 317            | 0.1607 | 39% H-2→L, 18% H-2→L+1                         | MLCT/LLCT  |
|          | S <sub>0</sub> →S <sub>5</sub> | 3.95  | 314            | 0.0881 | 55% H-7→L, 11% H-7→L+1                         | MLCT       |
|          | S <sub>0</sub> →T <sub>1</sub> | 2.77  | 447            | -      | 40% H→L+1, 19% H→L+3, 17% H→L                  | MLCT/IL    |
|          | S <sub>0</sub> →T <sub>2</sub> | 2.78  | 445            | -      | 48% H-1→L, 17% H-1→L+2, 13% H-1→L+1            | MLCT/IL    |
| <b>4</b> | S <sub>0</sub> →S <sub>1</sub> | 3.51  | 353            | 0.0914 | 52% H→L+1, 41% H→L                             | MLCT/IL    |
|          | S <sub>0</sub> →S <sub>2</sub> | 3.53  | 351            | 0.0984 | 68% H-1→L, 24% H-1→L+1                         | MLCT/IL    |
|          | S <sub>0</sub> →S <sub>3</sub> | 3.92  | 317            | 0.4409 | 49% H-2→L, 19% H-2→L+1, 14% H-3→L+1            | MLCT/IL    |
|          | S <sub>0</sub> →S <sub>4</sub> | 3.96  | 313            | 0.0731 | 54% H-3→L, 25% H-2→L+1                         | MLCT/IL    |
|          | S <sub>0</sub> →S <sub>5</sub> | 4.15  | 299            | 0.3347 | 31% H-4→L, 20% H-5→L+1, 17% H-5→L, 10% H-4→L+1 | MLCT/IL    |
|          | S <sub>0</sub> →T <sub>1</sub> | 2.81  | 441            | -      | 41% H→L+1, 25% H→L                             | MLCT/IL    |
|          | S <sub>0</sub> →T <sub>2</sub> | 2.82  | 440            | -      | 47% H-1→L, 22% H-1→L+1                         | MLCT/IL    |

<sup>a</sup> Oscillator strength; <sup>b</sup> L = LUMO, H = HOMO, rounded values.

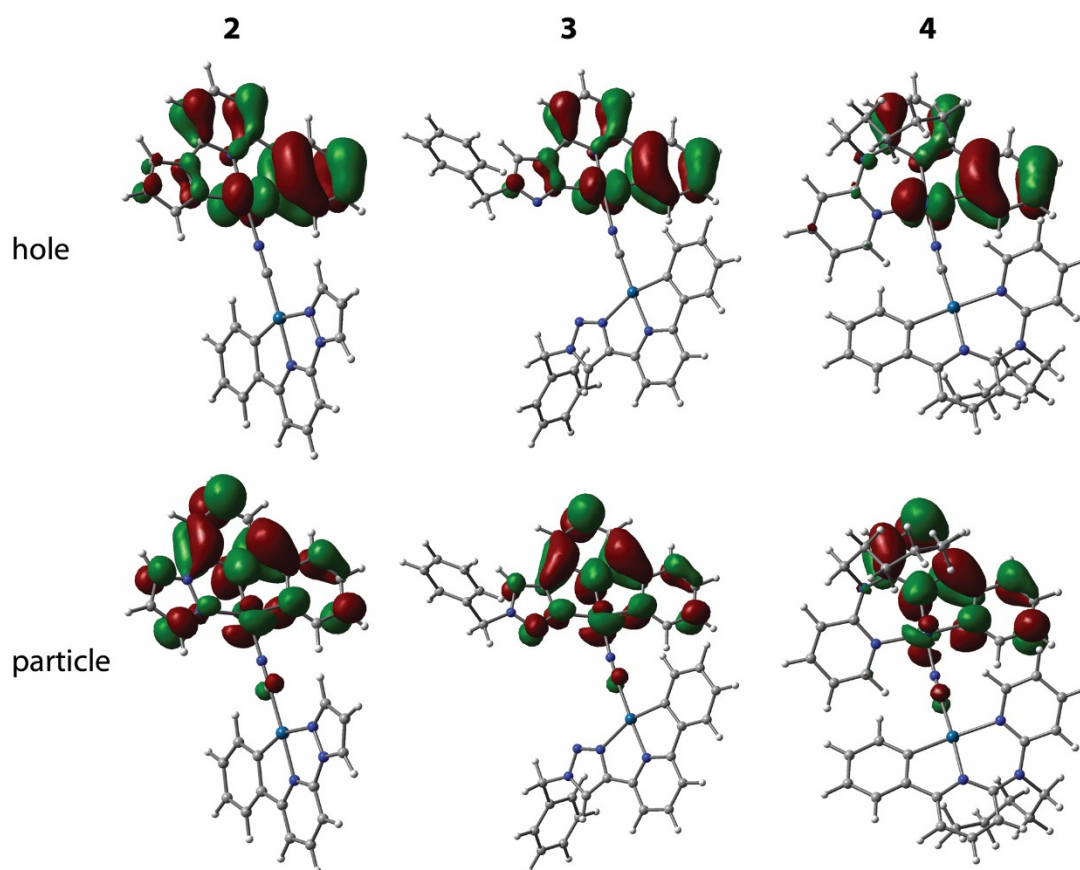

**Fig. S10.** TD-DFT-calculated natural transition orbital hole-particle pair for the vertical  $S_0 \rightarrow S_1$  transitions for the diplatinum cations of **2** to **4** in  $\text{CH}_2\text{Cl}_2$ . For **1**, see ref. <sup>16</sup>.

**Table S5.** Photophysical data of mononuclear congeners  $[\text{Pt}(\text{C}^{\wedge}\text{N}^{\wedge}\text{N})(\text{CN})]$  (**1\_mono** to **4\_mono**) in  $\text{CH}_2\text{Cl}_2$  solution.

| Complex                    | $\lambda_{\text{em,max}}$ |                      | $\tau_{\text{av}}, \mu\text{s}^a$ |                                           | $\Phi_{\text{L}} (\pm 0.02/0.05)$ |                  | $k_{\text{r}}, 10^5 \text{ s}^{-1}$ | $k_{\text{nr}}, 10^5 \text{ s}^{-1}$ |
|----------------------------|---------------------------|----------------------|-----------------------------------|-------------------------------------------|-----------------------------------|------------------|-------------------------------------|--------------------------------------|
|                            | 298 K                     | 77 K                 | 298 K <sup>b</sup>                | 77 K                                      | 298 K <sup>b</sup>                | 77 K             | 298 K                               |                                      |
| <b>1_mono</b> <sup>c</sup> | 562                       | 511, 550, 690        | 2.199±0.016                       | 2.8 (710 nm), 3.0 (690 nm), 13.7 (510 nm) | 0.1                               | 0.86 (abs. 0.03) | 0.45±0.09                           | 4.1±0.1                              |
| <b>2_mono</b> <sup>d</sup> | 502, 537, 575sh           | 488, 525, 625        | 10.91±0.02                        | 18.6 (490 nm), 5.1 (625 nm)               | 0.49                              | 0.95             | 0.45±0.02                           | 0.47±0.02                            |
| <b>3_mono</b> <sup>d</sup> | 505, 538, 576sh           | 495, 533, 590, 606   | 11.214±0.018                      | 10.5 (495 nm), 5.2 (600 nm)               | 0.43                              | 0.95             | 0.38±0.02                           | 0.51±0.02                            |
| <b>4_mono</b>              | 492, 528 560sh            | 490, 528, 560, 608sh | 9.78±0.07                         | 49.0                                      | 0.33                              | 0.95             | 0.34±0.02                           | 0.69±0.03                            |

<sup>a</sup> Amplitude-weighted average lifetimes determined by the equation  $\tau_{\text{av}} = \sum A_i \tau_i$ ,  $A_i$  = weight of the  $i$ -th component; <sup>b</sup> under an inert atmosphere of Ar; <sup>c</sup> data from ref. <sup>16</sup>; <sup>d</sup> the synthesis and solid-state luminescence were reported in ref. <sup>17</sup>.

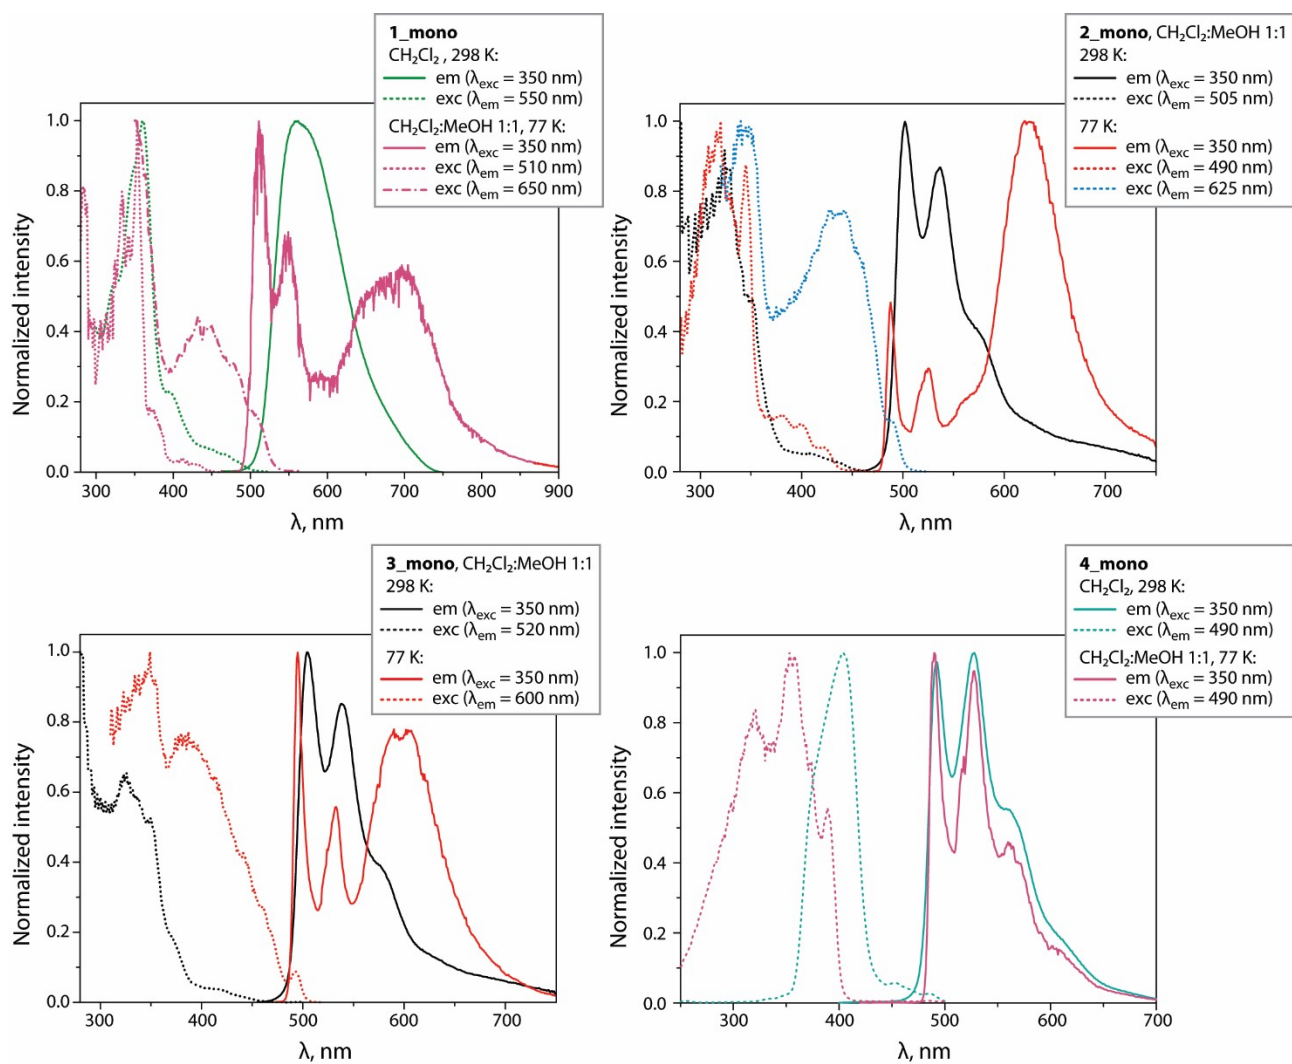

**Fig. S11.** Normalized excitation and emission spectra of complexes [Pt(C<sup>N</sup>^\*N)(CN)] (**1\_mono** to **4\_mono**) in solution at 298 and 77 K.

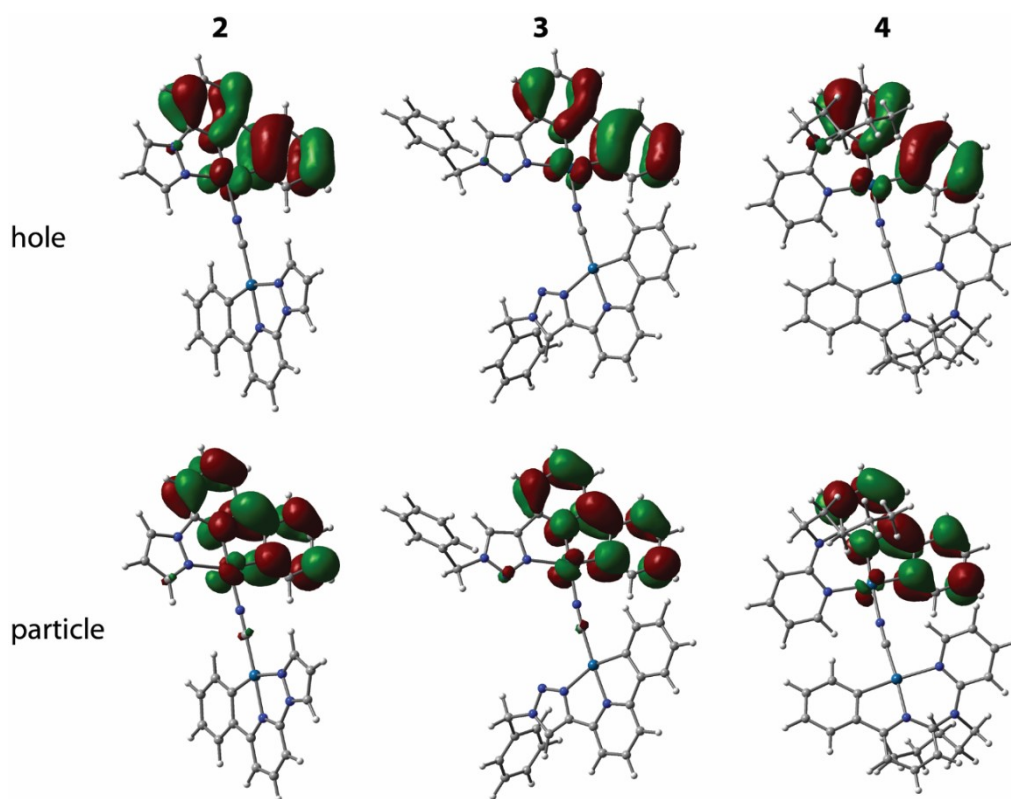

**Fig. S12.** Natural transition orbital hole-particle pair for the vertical  $T_1 \rightarrow S_0$  transitions for the diplatinum cations of **2** to **4** in  $\text{CH}_2\text{Cl}_2$  at the optimized excited state geometries.

**Table S6.** DFT-predicted vibrationally resolved phosphorescence for complexes **1** to **4** and vertical phosphorescence for their aggregates.

| Complex                             | $\lambda$ , nm     | Assignment |
|-------------------------------------|--------------------|------------|
| <b>1<sup>a</sup></b>                | 544, 596, 655      | MLCT/IL    |
| <b>2<sup>a</sup></b>                | 530, 577, 618, 629 | IL/MLCT    |
| <b>3<sup>a</sup></b>                | 528, 576, 618, 630 | IL/MLCT    |
| <b>4<sup>a</sup></b>                | 541, 588, 642      | IL/MLCT    |
| <b>1 dimer A (XRD)<sup>b</sup></b>  | 785                | MMLCT      |
| <b>1 dimer B (XRD)<sup>b</sup></b>  | 698                | MMLCT      |
| <b>2 dimer A (XRD)<sup>b</sup></b>  | 671                | MMLCT      |
| <b>3 dimer (XRD)<sup>b</sup></b>    | 584                | MMLCT      |
| <b>1 dimer (free)<sup>c</sup></b>   | 661                | MMLCT      |
| <b>1 trimer (free)<sup>c</sup></b>  | 782                | MMLCT      |
| <b>2 dimer B (free)<sup>c</sup></b> | 573                | MMLCT      |
| <b>2 trimer(free)<sup>c</sup></b>   | 685                | MMLCT      |

<sup>a</sup> Vibrationally resolved phosphorescence, 298 K,  $\text{CH}_2\text{Cl}_2$ ; <sup>b</sup> optimized geometry based on crystallographic data, vertical phosphorescence in vacuum (see Figs. S14, S15); <sup>c</sup> optimized free geometry, vertical phosphorescence in vacuum (see Figs. S14, S15).

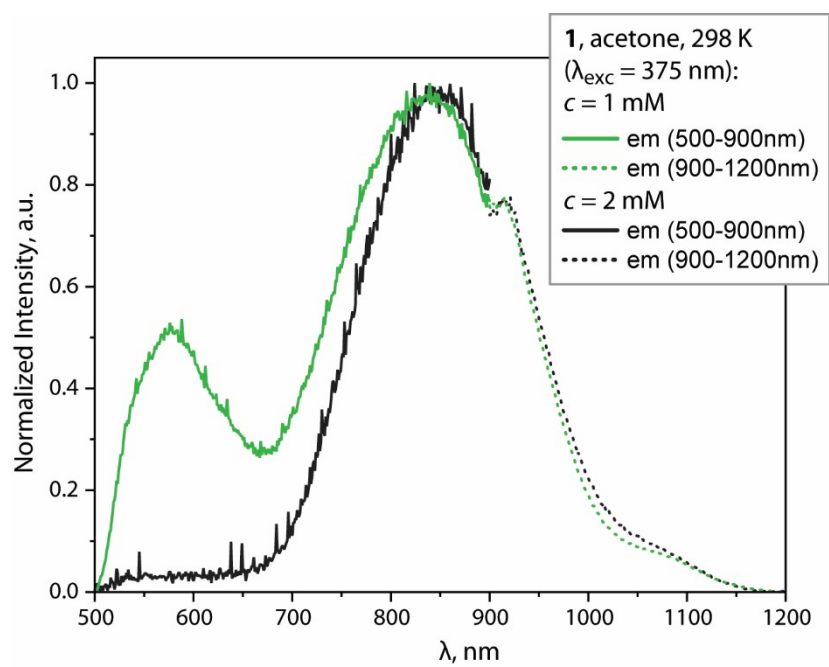

**Fig. S13.** Normalized room temperature emission spectra of **1** in acetone at  $c = 1 \text{ mM}$  (green line) and  $2 \text{ mM}$  (black line).



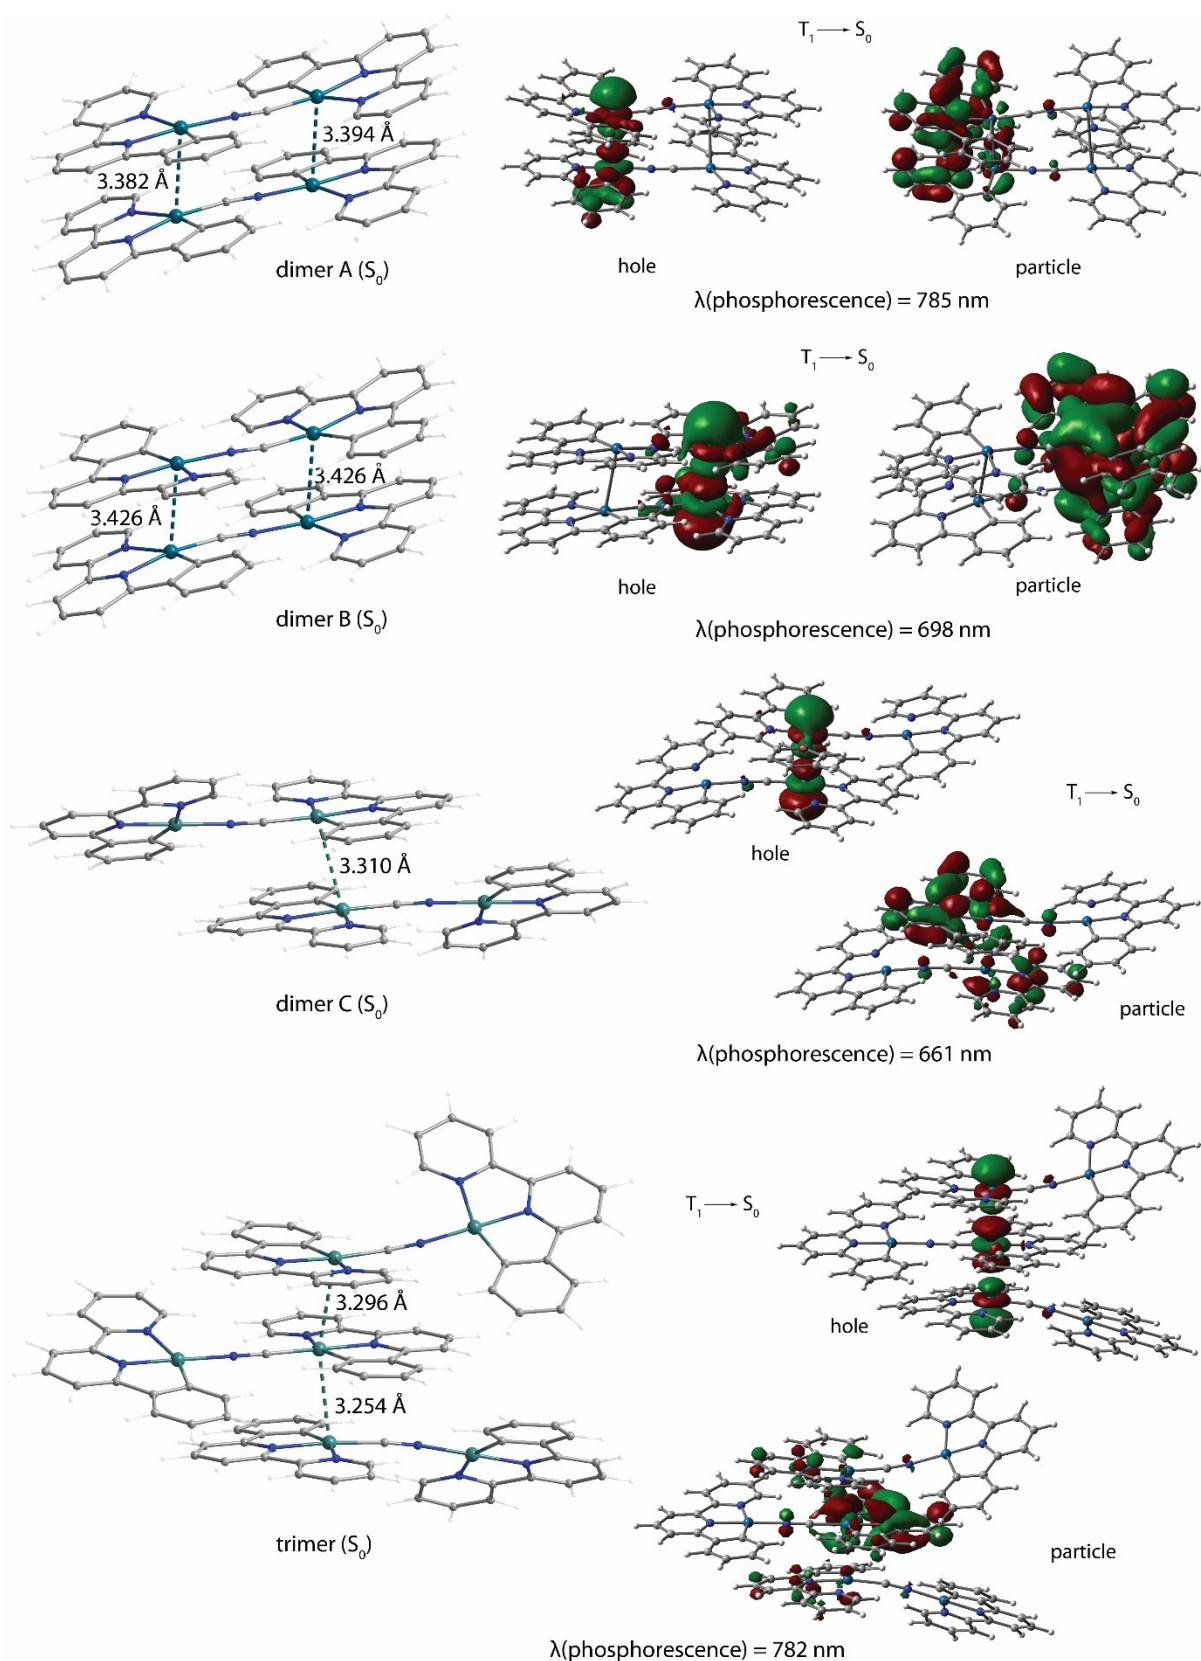

**Fig. S14.** Left: DFT-optimized ground state geometries of the dimers  $[1]_2^{2+}$  (A and B are based on crystallographic data, C has head-to-tail orientation of cyclometalated fragments) and the trimer  $[1]_3^{3+}$ . Right: natural transition orbital hole-particle pairs for the  $T_1 \rightarrow S_0$  transitions.



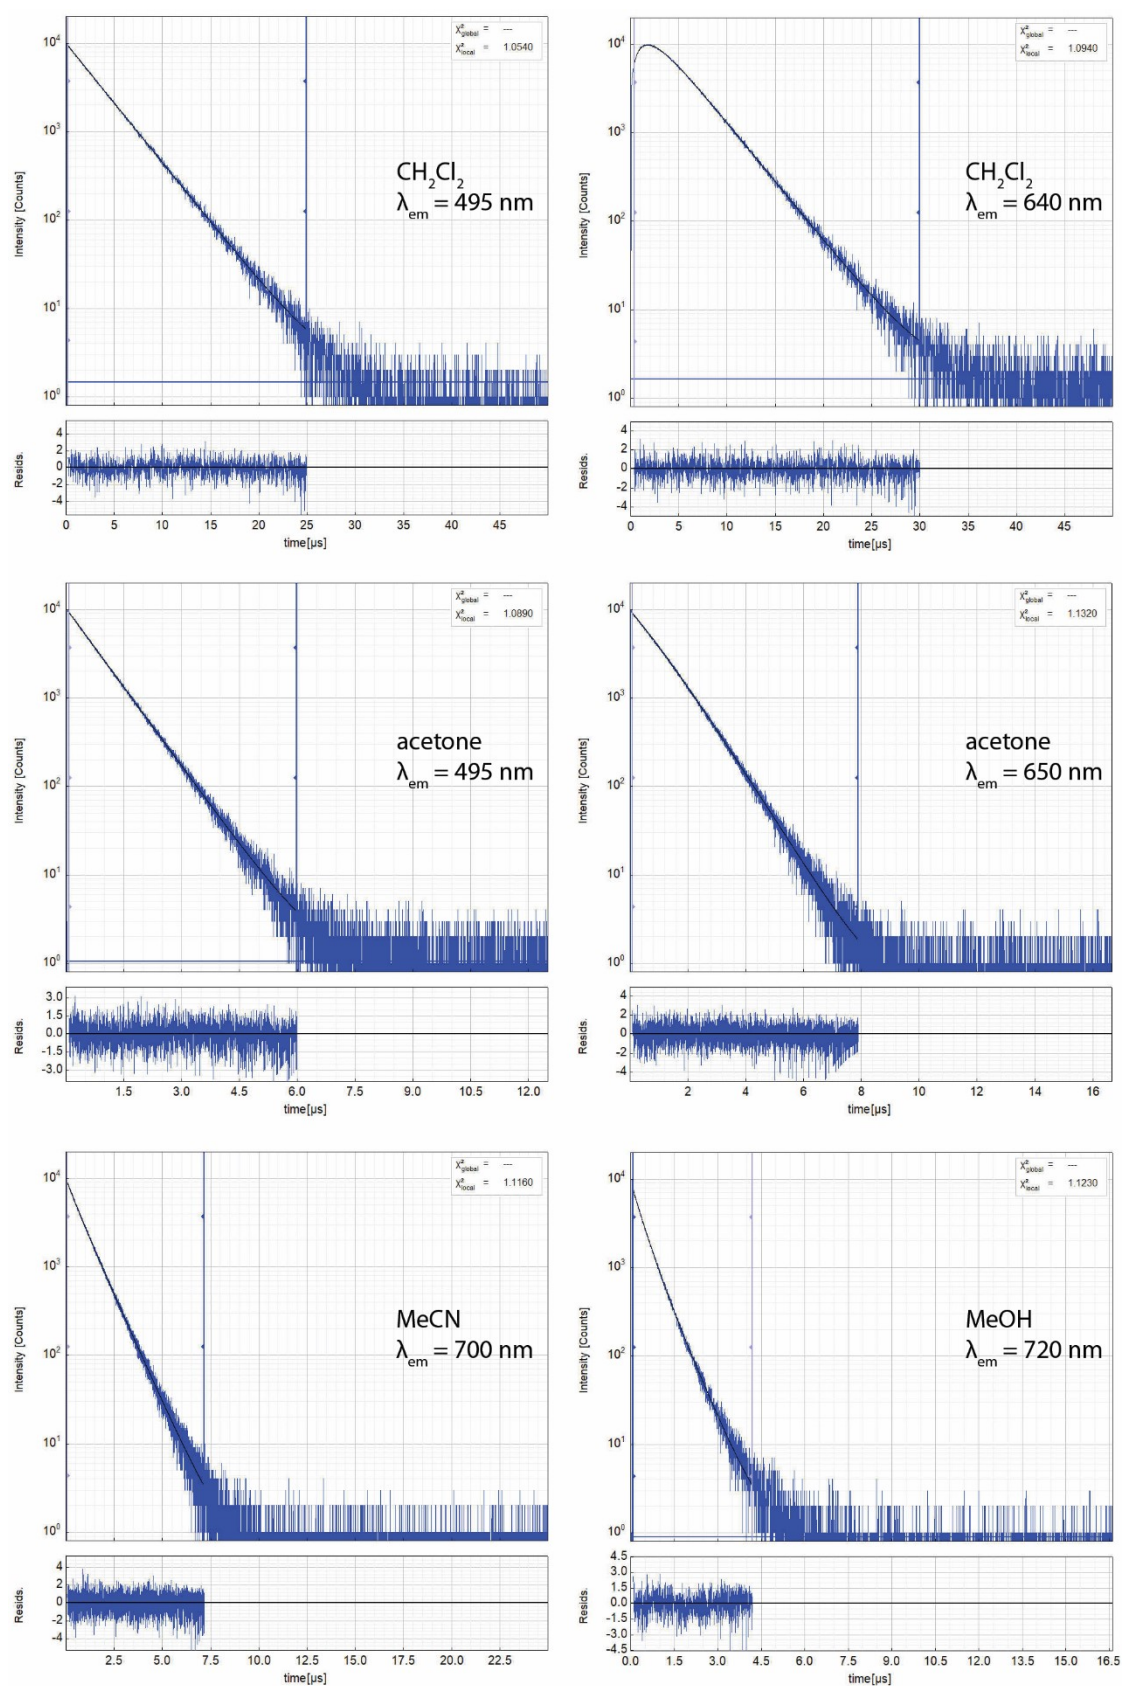

**Fig. S15.** Time-resolved photoluminescence decay profiles for **2** in  $\text{CH}_2\text{Cl}_2$ , acetone, MeCN, MeOH ( $c = 1 \text{ mM}$ , room temperature) monitored at different emission wavelengths.

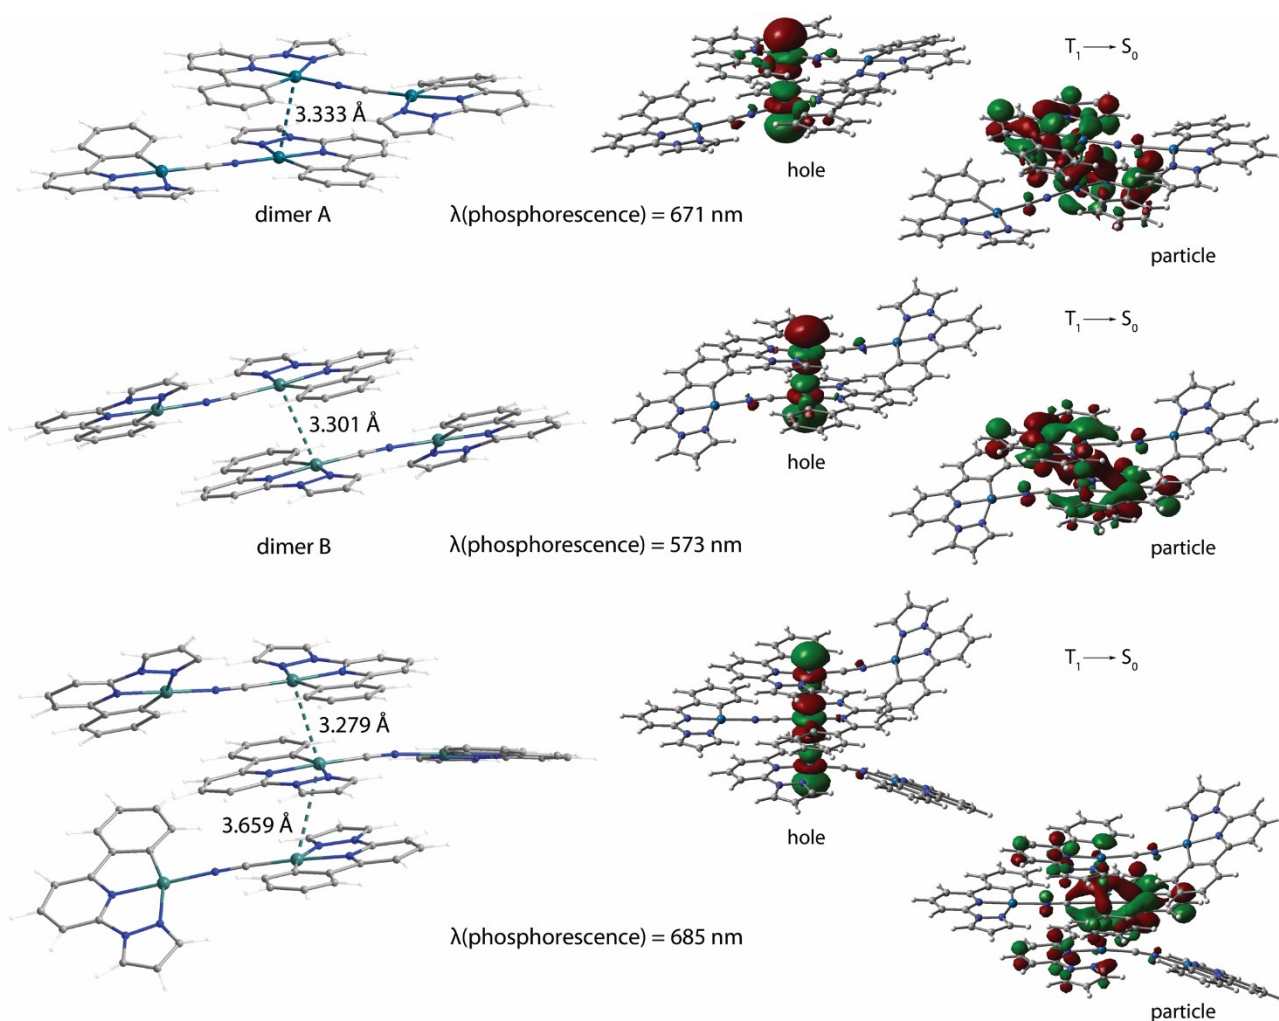

**Fig. S16.** Left: optimized ground state geometries of the dimers  $[2]_2^{2+}$  (A is based on crystallographic data, B has a head-to-tail orientation of the cyclometalated fragments) and the trimer  $[2]_3^{3+}$ . Right: natural transition orbital hole-particle pairs for the  $T_1 \rightarrow S_0$  transitions.

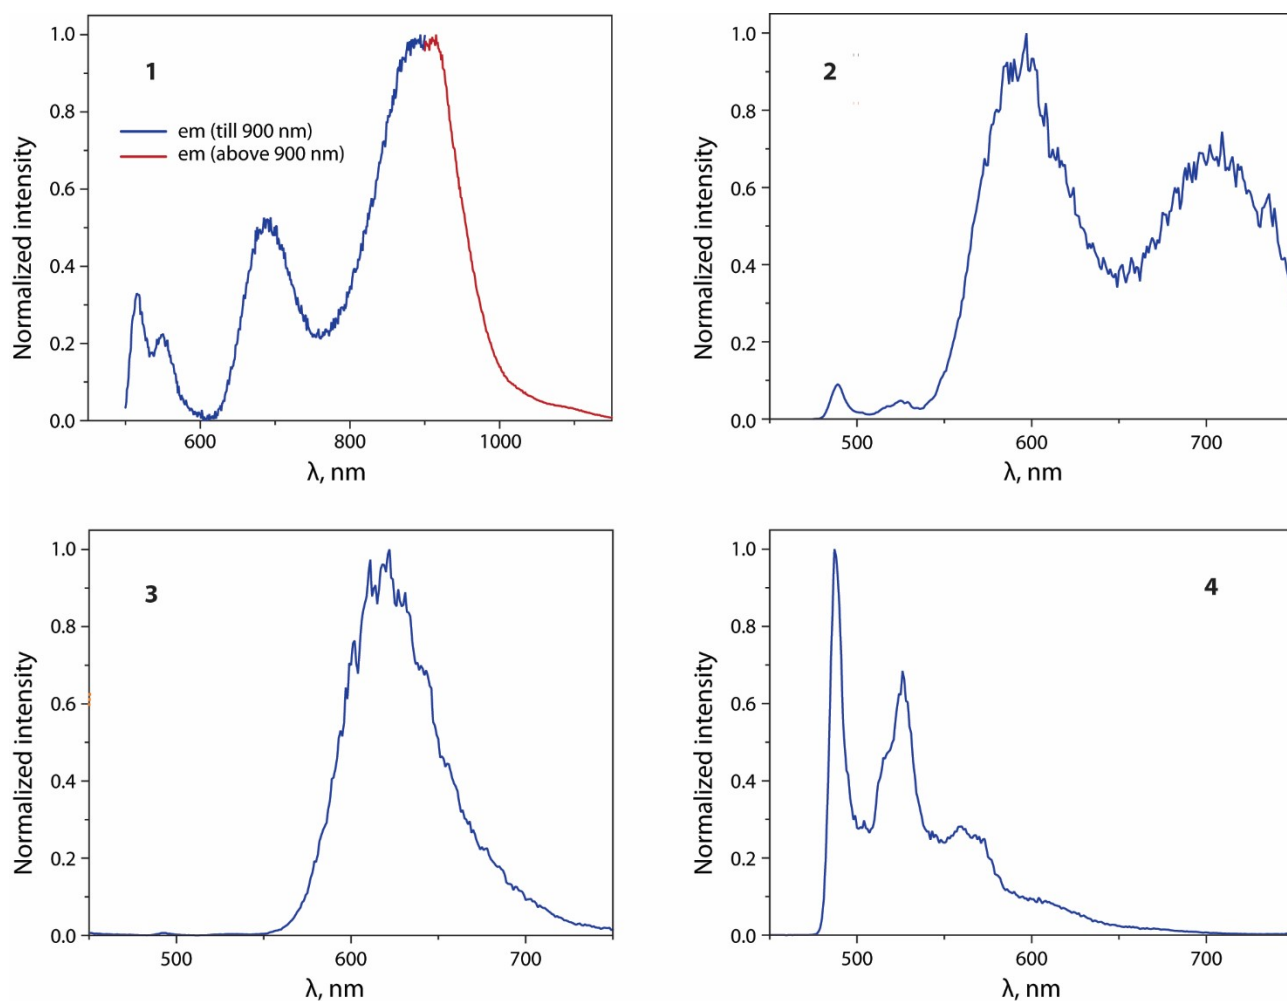

**Fig. S17.** Normalized emission spectra of optically dilute **1** to **4** in frozen (77 K)  $\text{CH}_2\text{Cl}_2\text{:MeOH}$  1:1 v/v mixture,  $\lambda_{\text{exc}} = 350$  nm.

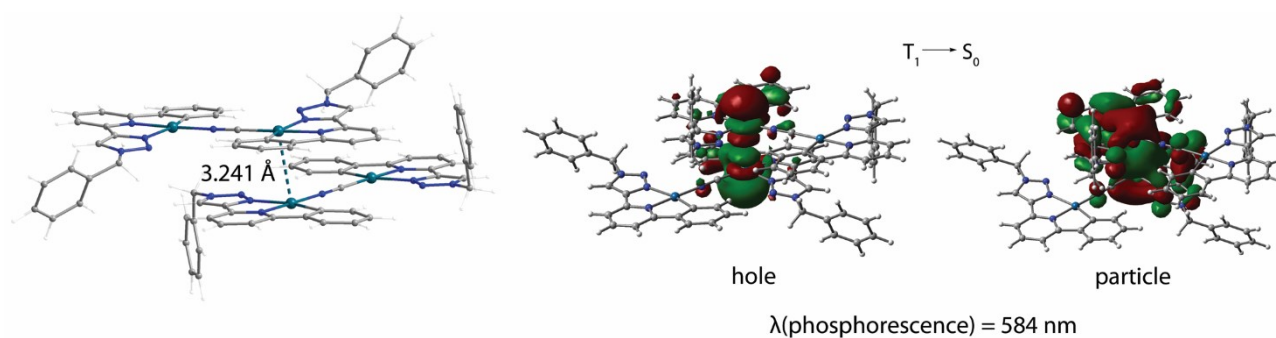

**Fig. S18.** Left: DFT-optimized ground state geometry of the dimer  $[\mathbf{3}]_2^{2+}$  based on crystallographic data. Right: natural transition orbital hole-particle pairs for the  $T_1 \rightarrow S_0$  transition.

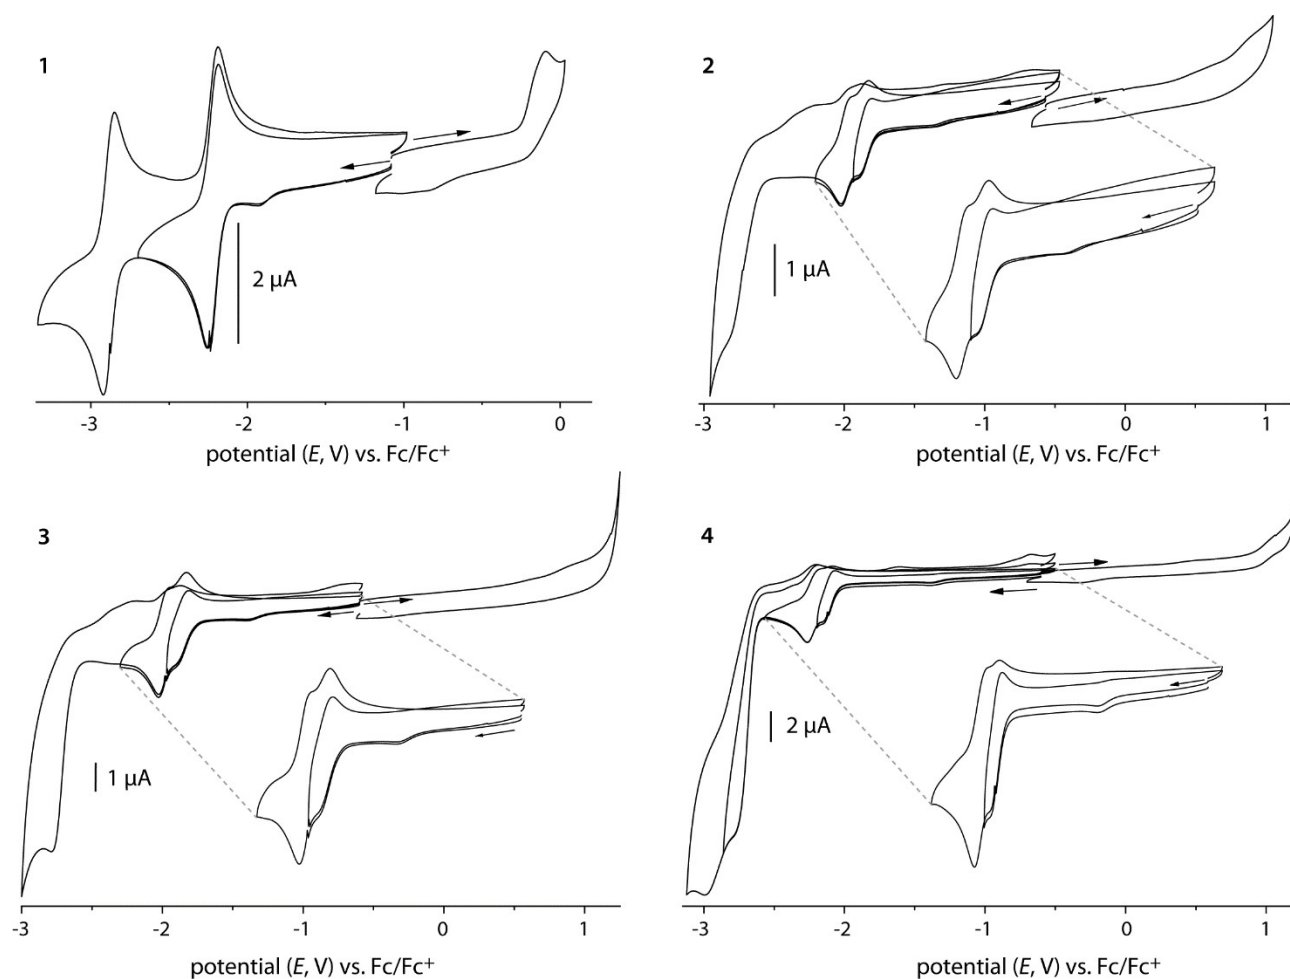

**Fig. S19.** Cyclic voltammograms of **1** to **4** in *n*-Bu<sub>4</sub>NPF<sub>6</sub>/DMF at a scan rate of 100 mV/s at 298 K.

**Table S7.** Redox potentials of the Pt(II) complexes **1** to **4**.<sup>a</sup>

| Complex  | $E_{pc}$ Red4 | $E_{pc}$ Red3 | $E_{1/2}$ Red2 | $E_{1/2}$ Red1 | $E_{pa}$ Ox1 | $\Delta E$<br>Red1-Red2 | $\Delta E$<br>Ox1-Red1 |
|----------|---------------|---------------|----------------|----------------|--------------|-------------------------|------------------------|
| <b>1</b> | -             | -             | -2.88          | -2.21          | -0.09        | 0.67                    | 2.12                   |
| <b>2</b> | -             | -2.82         | -1.98          | -1.85          | 0.87         | 0.13                    | 2.72                   |
| <b>3</b> | -             | -2.79         | -1.97          | -1.86          | 0.89         | 0.11                    | 2.75                   |
| <b>4</b> | -2.99         | -2.79         | -2.21          | -2.11          | 1.05         | 0.10                    | 3.16                   |

<sup>a</sup> From cyclic voltammetry in *n*-Bu<sub>4</sub>NPF<sub>6</sub>/DMF. Potentials in V vs. ferrocene/ferrocenium, half-wave potentials  $E_{1/2}$  for (partially) reversible processes, cathodic peak potentials  $E_{pc}$  and anodic peak potentials  $E_{pa}$  for irreversible reductions; accuracy of potentials:  $\pm 0.003$  V.

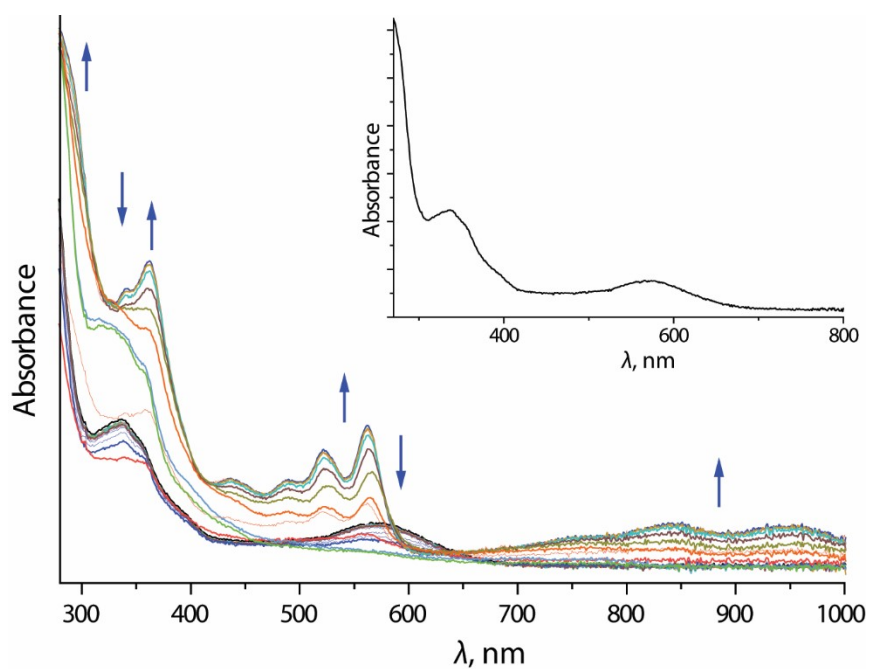

**Fig. S20.** UV-vis absorption spectra recorded during cathodic electrolysis (reduction) of compound **1** in  $n\text{-Bu}_4\text{NPF}_6/\text{DMF}$  (starting spectrum as insert).

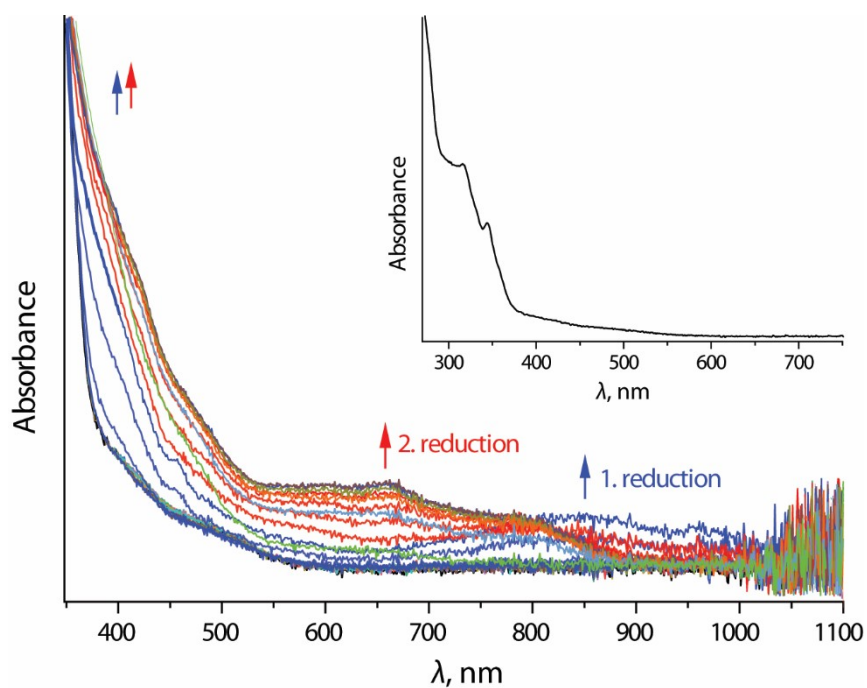

**Fig. S21.** UV-vis absorption spectra recorded during cathodic electrolysis (reduction) of compound **2** in  $n\text{-Bu}_4\text{NPF}_6/\text{DMF}$  (initial spectrum as insert).



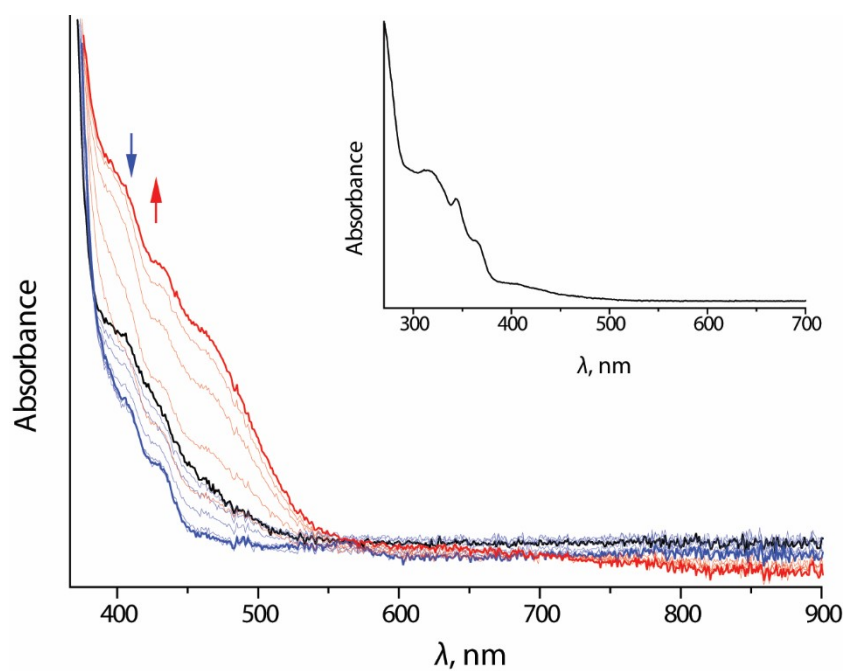

**Fig. S22.** UV-vis absorption spectra recorded during cathodic electrolysis (reduction) of compound **3** in  $n\text{-Bu}_4\text{NPF}_6/\text{DMF}$  (initial spectrum as insert).

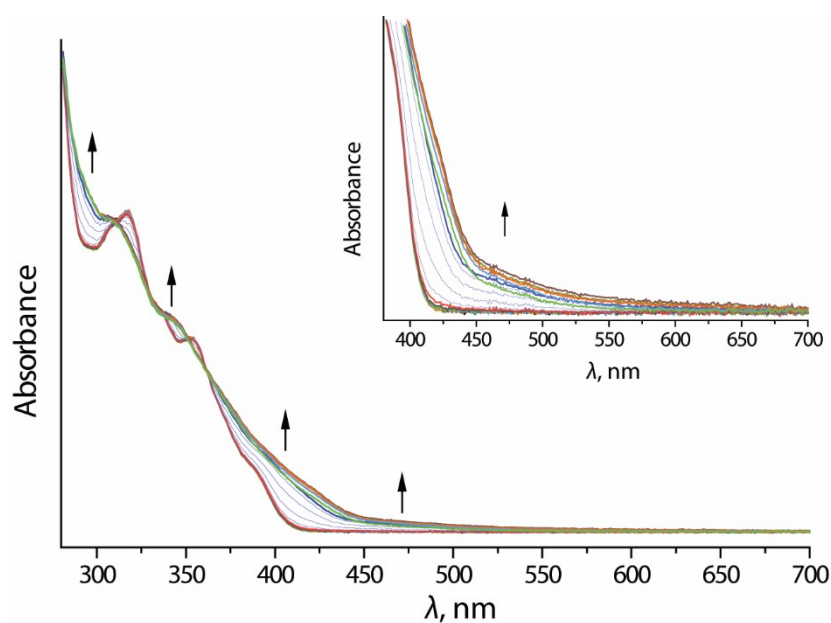

**Fig. S23.** UV-vis absorption spectra recorded during cathodic electrolysis (reduction) of compound **4** in  $n\text{-Bu}_4\text{NPF}_6/\text{DMF}$  (long-wavelength zoom as insert).

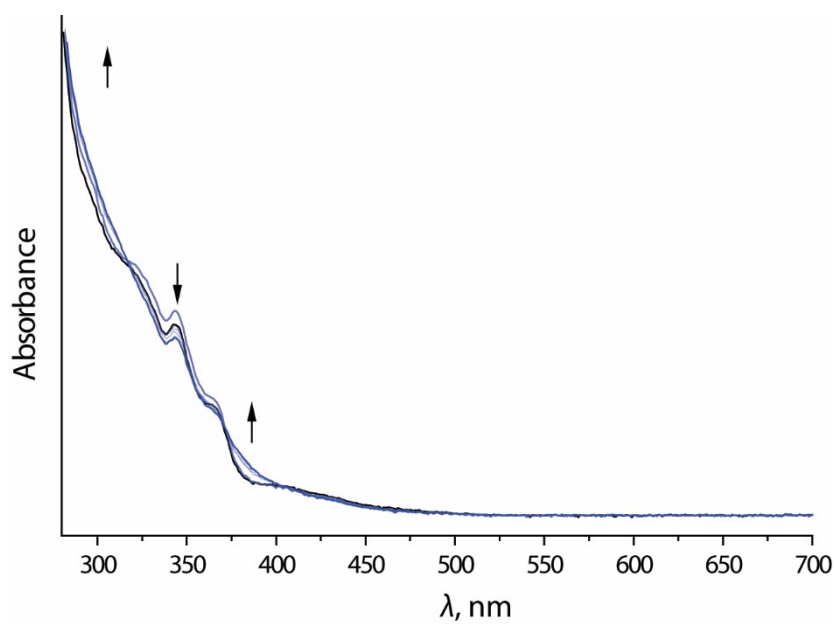

**Fig. S24.** UV-vis absorption spectra recorded during anodic electrolysis (oxidation) of compound **3** in  $n\text{-Bu}_4\text{NPF}_6/\text{DMF}$ .

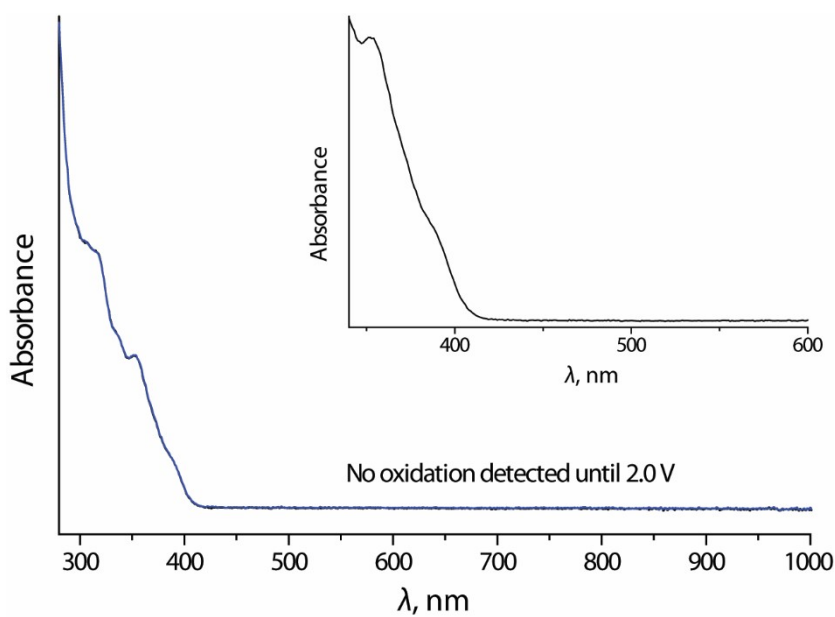

**Fig. S25.** UV-vis absorption spectra recorded during anodic electrolysis (oxidation) of compound **4** in  $n\text{-Bu}_4\text{NPF}_6/\text{DMF}$  (initial spectrum as insert).

## References

1. T.-C. Cheung, K.-K. Cheung, S.-M. Peng, C.-M. Che, *J. Chem. Soc., Dalton Trans.*, 1996, , 1645–1651.
2. M. Hebenbrock, L. Stegemann, J. Kösters, N. L. Doltsinis, J. Müller, C. A. Strassert, *Dalton Trans.*, 2017, **46**, 3160–3169.
3. C. F. Harris, D. A. K. Vezzu, L. Bartolotti, P. D. Boyle, S. Huo, *Inorg. Chem.*, 2013, **52**, 11711–11722.
4. S. Buss, C. A. Strassert, to be published elsewhere.
5. (a) W. Kaim, A. Klein, eds., *Spectroelectrochemistry*, The Royal Society of Chemistry, Cambridge, UK, 2008; (b) W. Kaim, J. Fiedler, *Chem. Soc. Rev.*, 2009, **38**, 3373–3382.
6. APEX2 - Software Suite for Crystallographic Programs, Bruker AXS, Inc., 2010.
7. G. M. Sheldrick, SADABS-2008/1 – Bruker AXS Area Detector Scaling and Absorption Correction, Bruker AXS, 2008.
8. G. M. Sheldrick, *Acta Crystallogr. C: Struct. Chem.*, 2015, **71**, 3–8.
9. L. J. Farrugia, *J. Appl. Crystallogr.*, 2012, **45**, 849–854.
10. (a) S. Dapprich, I. Komáromi, K. S. Byun, K. Morokuma, M. J. Frisch, *J. Mol. Struct.: THEOCHEM*, 1999, **461–462**, 1–21; (b) T. Vreven, K. S. Byun, I. Komáromi, S. Dapprich, J. A. Montgomery, Jr., K. Morokuma, M. J. Frisch, *J. Chem. Theory Comput.*, 2006, **2**, 815–826.
11. A. K. Rappe, C. J. Casewit, K. S. Colwell, W. A. Goddard, W. M. Skiff, *J. Am. Chem. Soc.*, 1992, **114**, 10024–10035.
12. M. J. Frisch, G. W. Trucks, H. B. Schlegel, G. E. Scuseria, M. A. Robb, J. R. Cheeseman, G. Scalmani, V. Barone, G. A. Petersson, H. Nakatsuji, X. Li, M. Caricato, A. V. Marenich, J. Bloino, B. G. Janesko, R. Gomperts, B. Mennucci, H. P. Hratchian, J. V. Ortiz, A. F. Izmaylov, J. L. Sonnenberg, D. Williams-Young, F. Ding, F. Lipparini, F. Egidi, J. Goings, B. Peng, A. Petrone, T. Henderson, D. Ranasinghe, V. G. Zakrzewski, J. Gao, N. Rega, G. Zheng, W. Liang, M. Hada, M. Ehara, K. Toyota, R. Fukuda, J. Hasegawa, M. Ishida, T. Nakajima, Y. Honda, O. Kitao, H. Nakai, T. Vreven, K. Throssell, J. A. J. Montgomery, J. E. Peralta, F. Ogliaro, M. J. Bearpark, J. J. Heyd, E. N. Brothers, K. N. Kudin, V. N. Staroverov, T. A. Keith, R. Kobayashi, J. Normand, K. Raghavachari, A. P. Rendell, J. C. Burant, S. S. Iyengar, J. Tomasi, M. Cossi, J. M. Millam, M. Klene, C. Adamo, R. Cammi, J. W. Ochterski, R. L. Martin, K. Morokuma, O. Farkas, J. B. Foresman, D. J. Fox, Gaussian 16, Revision A.03, Gaussian, Inc., 2016.
13. H. S. Yu, X. He, S. L. Li, D. G. Truhlar, *Chem. Sci.*, 2016, **7**, 5032–5051.



14. (a) F. Weigend, R. Ahlrichs, *Phys. Chem. Chem. Phys.*, 2005, **7**, 3297–3305; (b) D. Andrae, U. Häußermann, M. Dolg, H. Stoll, H. Preuß, *Theor. Chem. Acc.*, 1990, **77**, 123–141.
15. (a) V. Barone, M. Cossi, *J. Phys. Chem. A*, 1998, **102**, 1995–2001; (b) M. Cossi, N. Rega, G. Scalmani, V. Barone, *J. Comput. Chem.*, 2003, **24**, 669–681.
16. T. Eskelinen, S. Buss, S. K. Petrovskii, E. V. Grachova, M. Krause, L. Kletsch, A. Klein, C. A. Strassert, I. O. Koshevoy, P. Hirva, *Inorg. Chem.*, 2021, **60**, 8777–8789.
17. V. Sivchik, A. Kochetov, T. Eskelinen, K. S. Kisel, A. I. Solomatina, E. V. Grachova, S. P. Tunik, P. Hirva, I. O. Koshevoy, *Chem. Eur. J.*, 2021, **27**, 1787–1794.
